# Supplementary material
Source: MDPI journal article supplement (https://www.mdpi.com/2071-1050/15/3/2836)
Supplement: s1 [file s1]

**Contents:**

**Table S1** FTIR spectroscopic functional group attribution of mineral based potassium humate (MBPH) and soils.

**Table S2** Effects of application of mineral based potassium humate (MBPH) on the growth of *Oryza sativa* L. under different soil contaminated levels.

**Table S3** Effects of application of mineral based potassium humate (MBPH) on photosynthetic parameters and SPAD under different soil contaminated levels.

**Table S4** Effects of application of mineral based potassium humate (MBPH) on transfer factors (TFs) of Cd between different organs of rice under different soil contaminated levels.

**Table S5** Spearman correlation among soil solution chemistry, minerals in brown rice, photosynthetic and chlorophyll fluorescence characteristics, enzyme activity of leaves, soil DTPA-Cd and Cd in brown rice under S-Cd soils.

**Table S6** Spearman correlation among soil solution chemistry, minerals in brown rice, photosynthetic and chlorophyll fluorescence characteristics, enzyme activity of leaves, soil DTPA-Cd and Cd in brown rice under M-Cd soils.

**Table S7** Spearman correlation among soil solution chemistry, minerals in brown rice, photosynthetic and chlorophyll fluorescence characteristics, enzyme activity of leaves, soil DTPA-Cd and Cd in brown rice under H-Cd soils.

**Table S8** Spearman correlation among soil solution chemistry, minerals in brown rice, photosynthetic and chlorophyll fluorescence characteristics, enzyme activity of leaves, soil DTPA-Cd and Cd in brown rice using all the data.

**Figure.S1.** Effects of application of mineral based potassium humate (MBPH) on pH (A-C), DOC (D-F), and K (G-I) in soil solution at different growth stages of rice under different soil contaminated levels. DOC, dissolved organic carbon; S-Cd, slightly contaminated soil (1 mg kg<sup>-1</sup>); M-Cd, moderately contaminated soil (2 mg kg<sup>-1</sup>); H-Cd, highly contaminated soil (4 mg kg<sup>-1</sup>). Lowercase letters indicate significant differences in different MBPH levels under the same Cd-contaminated soil; capital letters indicate significant differences among different Cd-contaminated soils at the same level of MBPH application ( $p < 0.05$ , Duncan test and Kruskal–Wallis test).

**Figure.S2.** Effects of application of mineral based potassium humate (MBPH) on the antioxidant enzyme activities of rice leaves at tillering stage under different soil contaminated levels. SOD (A), superoxide dismutase; POD (B), peroxidase, CAT (C), catalase; S-Cd, slightly contaminated soil (1 mg kg<sup>-1</sup>); M-Cd, moderately contaminated soil (2 mg kg<sup>-1</sup>); H-Cd, highly contaminated soil (4 mg kg<sup>-1</sup>). Lowercase letters indicate significant differences in different MBPH levels under the same Cd-contaminated soil; capital letters indicate significant differences among different Cd-contaminated soils at the same level of MBPH application ( $p < 0.05$ , Duncan test and Kruskal–Wallis test).

**Figure.S3.** Prediction equation validation in S-Cd (A), slightly contaminated soil (1 mg kg<sup>-1</sup>); M-Cd (B), moderately contaminated soil (2 mg kg<sup>-1</sup>); H-Cd (C), highly contaminated soil (4 mg kg<sup>-1</sup>); All the data (D).

**Figure.S4.** Spearman correlation matrix for Cd concentration in brown rice and agronomic traits of rice. Diagonal shows the variable distribution diagram; the top right of the diagonal shows the Spearman correlation coefficient the level of significance ( $p < 0.05$  \*;  $p < 0.01$  \*\*;  $p < 0.001$ \*\*\*). S-Cd (A), slightly contaminated soil (1 mg kg<sup>-1</sup>); M-Cd (B), moderately contaminated soil (2 mg kg<sup>-1</sup>); H-Cd (C), highly contaminated soil (4 mg kg<sup>-1</sup>); All the data (D). Cd, Cd concentration in brown rice; PH, Plant height; SL, spike length; TKW, thousand kernel weight; SDW, stem dry weight; OLDW, ordinary leaves dry weight; FLDW, flag leaves dry weight; ADMA, dry matter accumulation of aboveground; RDW, root dry weight.

**Table S1** FTIR spectroscopic functional group attribution of mineral based potassium humate (MBPH) and soils.

| Peaks (cm <sup>-1</sup> ) | Tentative assignments of functional groups                      | References |
|---------------------------|-----------------------------------------------------------------|------------|
| 3686, 3619, 3616          | O-H stretching vibration of alcohols, phenols and clay          | [90,91]    |
| 3189                      | O-H and N-H stretching vibration of alcohols, phenols and amine | [91,92]    |
| 1637                      | C=O stretching vibration of aromatic series                     | [91,93]    |
| 1564                      | Amide II band in organic matter                                 | [94]       |
| 1434, 1372                | -COOH stretching vibration of carboxylate                       | [95]       |
| 1008                      | C-O stretch of cellulose                                        | [90]       |
| 981                       | C-O stretch of polysaccharide                                   | [96]       |
| 912                       | O-H bend of carboxylic acids                                    | [97]       |
| 879, 872                  | CO <sub>3</sub> <sup>2-</sup>                                   | [98,99]    |
| 778                       | C-H, CO <sub>3</sub> <sup>2-</sup>                              | [99]       |
| 754                       | C-H bending aromatic CH out-of-plane deformation                | [100]      |
| 694                       | C-H groups of aromatic series                                   | [93]       |
| 666                       | O-H libration                                                   | [101]      |
| 530, 514, 464             | Si-O bending vibration                                          | [102,103]  |

**Table S2** Effects of application of mineral based potassium humate (MBPH) on the growth of rice (*Oryza sativa* L.) under different soil contaminated levels.

| Soil Cd<br>contaminated<br>level | MBPH<br>dose | PH         | SL            | TKW           | SDW           | OLDW         | FLDW         | ADMA <sup>a</sup> | RDW          |
|----------------------------------|--------------|------------|---------------|---------------|---------------|--------------|--------------|-------------------|--------------|
|                                  |              | cm         |               | g             |               |              |              |                   |              |
| S-Cd                             | 0% (CK)      | 81.97±3.61 | 14.61±0.45Ab  | 25.50±1.12Ab  | 13.93±1.06Ab  | 4.92±0.80Aa  | 0.52±0.04Ac  | 19.37±1.81Ab      | 3.18±0.22Ab  |
|                                  | 0.25%        | 79.93±1.01 | 15.93±0.24Aa  | 26.84±1.12Aab | 15.57±0.32Aab | 5.19±0.52Aa  | 0.67±0.09Ab  | 21.43±0.82Aab     | 3.82±0.58Aab |
|                                  | 0.5%         | 83.07±2.06 | 15.67±0.54ABa | 25.09±1.00Bb  | 17.12±2.50Aa  | 5.78±0.50Aa  | 1.31±0.06Aa  | 24.21±2.98Aa      | 4.33±0.68Aa  |
|                                  | 1%           | 79.93±2.20 | 16.44±0.56Aa  | 28.29±1.60Aa  | 13.52±1.48Bb  | 5.09±0.79Aa  | 0.57±0.06Abc | 19.18±2.27Ab      | 3.67±0.40Aab |
| M-Cd                             | 0% (CK)      | 85.93±4.14 | 15.53±1.07Aa  | 25.25±0.38Aa  | 13.09±0.39Ab  | 4.86±0.51Aa  | 0.42±0.05Ba  | 18.36±0.71Ab      | 3.29±0.30Ab  |
|                                  | 0.25%        | 86.07±4.05 | 16.01±0.41Aa  | 24.57±0.82Ba  | 15.02±1.02Aab | 4.74±0.32Aa  | 0.39±0.05Ba  | 20.15±1.26Aab     | 3.49±0.15Ab  |
|                                  | 0.5%         | 81.47±3.39 | 14.77±0.28Ba  | 25.81±0.58ABa | 16.29±1.39Aa  | 4.68±1.09ABa | 0.40±0.15Aa  | 21.37±2.29ABab    | 4.17±0.03Aa  |
|                                  | 1%           | 82.20±2.31 | 15.12±0.39Ba  | 25.49±1.12Ba  | 16.64±1.31Aa  | 5.46±0.58Aa  | 0.64±0.26Aa  | 22.73±2.15Aa      | 4.20±0.48Aa  |
| H-Cd                             | 0% (CK)      | 80.83±1.82 | 14.33±0.80Ab  | 25.22±0.93Aa  | 12.64±0.43Ab  | 4.61±0.16Aa  | 0.28±0.02Ca  | 17.53±0.47Ac      | 3.00±0.35Ab  |
|                                  | 0.25%        | 81.87±0.81 | 16.30±0.42Aa  | 26.48±1.23ABa | 12.81±0.57Bb  | 4.72±0.56Aa  | 0.34±0.11Ba  | 17.87±1.00Bc      | 3.41±0.28Aab |
|                                  | 0.5%         | 81.17±3.74 | 16.01±0.80Aa  | 27.01±0.19Aa  | 14.71±0.71Aa  | 4.14±0.17Ba  | 0.37±0.02Aa  | 19.22±0.75Bb      | 3.26±0.17Bab |
|                                  | 1%           | 81.57±0.97 | 15.26±0.62Bab | 25.84±1.12ABa | 15.78±0.55ABa | 4.72±0.48Aa  | 0.41±0.09Aa  | 20.91±0.20Aa      | 3.68±0.34Aa  |

<sup>a</sup> ADMA = SDW+OLDW+FLDW. S-Cd, slightly contaminated soil (1 mg kg<sup>-1</sup>); M-Cd, moderately contaminated soil (2 mg kg<sup>-1</sup>); H-Cd, highly contaminated soil (4 mg kg<sup>-1</sup>). PH, Plant height; SL, spike length; TKW, thousand kernel weight; SDW, stem dry weight; OLDW, ordinary leaves dry weight; FLDW, flag leaves dry weight; ADMA, dry matter accumulation of aboveground; RDW, root dry weight. Lowercase letters indicate significant differences in different MBPH levels under the same Cd-contaminated soil; capital letters indicate significant differences among different Cd-contaminated soils at the same level of MBPH ( $p<0.05$ , Duncan test and Kruskal–Wallis test).

**Table S3** Effects of application of mineral based potassium humate (MBPH) on photosynthetic parameters and SPAD under different soil contaminated levels.

| Soil Cd<br>contaminated level |                                 | S-Cd        |           |           |           | M-Cd      |           |             |           | H-Cd       |            |           |           |
|-------------------------------|---------------------------------|-------------|-----------|-----------|-----------|-----------|-----------|-------------|-----------|------------|------------|-----------|-----------|
| MBPH dose                     |                                 | 0% (CK)     | 0.25%     | 0.5%      | 1%        | 0% (CK)   | 0.25%     | 0.5%        | 1%        | 0% (CK)    | 0.25%      | 0.5%      | 1%        |
| Pn                            | Tilling                         | 17.1±0.41   | 19.6±1.53 | 21.1±2.13 | 20.3±1.96 | 20.2±2.84 | 21.3±3.47 | 19.7±2.76   | 21.6±1.35 | 14.6±2.58  | 21.1±2.23  | 18.9±1.64 | 19.5±0.14 |
|                               |                                 | ABb         | Aab       | Aa        | Aa        | Aa        | Aa        | Aa          | Aa        | Bb         | Aa         | Aa        | Aa        |
|                               | Filling                         | 7.93±0.585  | 7.98±2.17 | 11.0±3.27 | 7.87±1.59 | 6.52±1.30 | 12.1±2.64 | 13.8±0.92   | 9.74±0.2  | 7.12±0.42  | 9.55±3.67  | 11.7±1.10 | 11.1±2.89 |
|                               |                                 | Aa          | Aa        | Aa        | Aa        | Ab        | Aab       | Aa          | Aab       | Aa         | Aa         | Aa        | Aa        |
|                               | Maturity                        | 1.27±0.0161 | 1.65±0.78 | 2.57±0.47 | 2.37±0.68 | 0.9±0.18  | 1.89±0.29 | 1.33±0.0094 | 2.42±0.71 | 0.85±0.049 | 3.03±0.001 | 1.97±0.1  | 2.48±0.43 |
|                               |                                 | Aa          | Aa        | Aa        | Aa        | Bb        | Aa        | Ca          | Aa        | Bc         | Aa         | Bb        | Ab        |
| Tr                            | Tilling<br>(10 <sup>-3</sup> )  | 5.39±0.754  | 4.97±0.87 | 5.38±0.37 | 3.99±1.15 | 5.55±1.04 | 5.69±0.26 | 4.24±1.85   | 5.82±0.48 | 3.6±0.3    | 5.23±0.75  | 4.89±0.83 | 4.86±0.21 |
|                               |                                 | ABa         | Aa        | Aa        | ABa       | Aa        | Aa        | Aa          | Aa        | Bb         | Aa         | Aa        | Ba        |
|                               | Filling<br>(10 <sup>-3</sup> )  | 2.09±1.12   | 2.28±0.96 | 3.72±1.47 | 3.56±2.09 | 1.86±1.05 | 3.87±0.81 | 3.57±0.41   | 2.66±0.53 | 2.52±0.2   | 3.21±2.02  | 2.82±1.03 | 2.69±0.27 |
|                               |                                 | Aa          | Aa        | Aa        | Aa        | Ab        | Aa        | Aa          | Aab       | Aa         | Aa         | Aa        | Aa        |
|                               | Maturity<br>(10 <sup>-4</sup> ) | 3.12±1.15   | 6.41±2.26 | 9.4±5.74  | 5.68±0.91 | 4.45±2.84 | 10.4±3.09 | 4.72±1.88   | 4.12±2.01 | 1.18±0.15  | 7.42±0.88  | 3.47±0.34 | 7.56±0.79 |
|                               |                                 | Aa          | Aa        | Aa        | ABa       | Ab        | Aa        | Ab          | Bb        | Ac         | Aa         | Ab        | Aa        |
| Ci                            | Tilling                         | 309±2.79    | 317±6.00  | 315±7.20  | 308±22.3  | 317±0.85  | 318±13.0  | 294±32.3    | 316±1.15  | 316±17.9   | 310±0.85   | 311±4.76  | 310±0.87  |
|                               |                                 | Aa          | Aa        | Aa        | Aa        | Aa        | Aa        | Aa          | Aa        | Aa         | Aa         | Aa        | Aa        |
|                               | Filling                         | 257±83.5    | 278±14.2  | 292±19.0  | 300±59.6  | 266±50.9  | 295±14.1  | 269±15.5    | 278±24.7  | 304±13.8   | 293±21.1   | 256±41.3  | 260±44.1  |
|                               |                                 | Aa          | Aa        | Aa        | Aa        | Aa        | Aa        | Aa          | Aa        | Aa         | Aa         | Aa        | Aa        |
|                               | Maturity                        | 279±38.9    | 327±10.1  | 298±60.0  | 286±16.5  | 322±38.5  | 338±23.2  | 306±44.7    | 214±92.9  | 206±34.9   | 284±13.0   | 306±56.7  | 318±30.2  |
|                               |                                 | ABa         | Aa        | Aa        | Aa        | Aab       | Aa        | Aab         | Ab        | Bb         | Ba         | Aa        | Aa        |

Continued Table S3.

| Soil Cd contaminated level     |                              | S-Cd        |             |             |             | M-Cd        |             |             |             | H-Cd        |            |            |             |
|--------------------------------|------------------------------|-------------|-------------|-------------|-------------|-------------|-------------|-------------|-------------|-------------|------------|------------|-------------|
| MBPH dose                      |                              | 0% (CK)     | 0.25%       | 0.5%        | 1%          | 0% (CK)     | 0.25%       | 0.5%        | 1%          | 0% (CK)     | 0.25%      | 0.5%       | 1%          |
| gs                             | Tilling                      | 0.95±0.28   | 1.03±0.39   | 1.02±0.14   | 0.65±0.24   | 1.14±0.4    | 1.25±0.17   | 0.77±0.46   | 1.21±0.19   | 0.54±0.067  | 0.94±0.22  | 0.8±0.24   | 0.79±0.012  |
|                                |                              | ABa         | Aa          | Aa          | ABa         | Aa          | Aa          | Aa          | Aa          | Bb          | Aa         | Aab        | Bab         |
|                                | Filling                      | 0.15±0.11   | 0.137±0.059 | 0.22±0.09   | 0.234±0.15  | 0.11±0.059  | 0.24±0.062  | 0.22±0.028  | 0.17±0.039  | 0.15±0.016  | 0.21±0.15  | 0.17±0.079 | 0.16±0.017  |
|                                |                              | Aa          | Aa          | Aa          | Aa          | Ab          | Aa          | Aa          | Aab         | Aa          | Aa         | Aa         | Aa          |
|                                | Maturity (10 <sup>-2</sup> ) | 2.1±0.76    | 4.24±1.7    | 6.1±3.8     | 3.7±0.65    | 2.8±1.7     | 7±2.3       | 3±1.3       | 2.7±1.3     | 0.75±0.1    | 4.8±0.61   | 2.2±0.24   | 6.2±2.3     |
|                                |                              | Aa          | Aa          | Aa          | ABa         | Ab          | Aa          | Ab          | Bb          | Ab          | Aa         | Aa         | Aa          |
| SPAD                           | Tilling                      | 50.1±0.15   | 50.5±0.4    | 53.6±0.3    | 51.8±0.5    | 49±0.7      | 51.1±1.21   | 50.6±1.57   | 49.6±0.25   | 46.3±0.78   | 50.4±1.06  | 48.9±1.3   | 48.9±0.71   |
|                                |                              | Ac          | Ac          | Aa          | Ab          | Aa          | Aa          | Ba          | Ba          | Bb          | Aa         | Ba         | Ba          |
|                                | Filling                      | 49.5±0.35   | 50.8±0.35   | 53.2±0.31   | 51.7±0.84   | 48±0.4      | 53.8±0.4    | 54.4±0.21   | 56±1.24     | 45±0.76     | 49.5±0.058 | 52.1±0.36  | 54.5±0.45   |
|                                |                              | Ad          | Bc          | Ba          | Bb          | Bc          | Ab          | Aab         | Aa          | Cd          | Cc         | Cb         | Aa          |
|                                | Maturity                     | 18.5±1.08   | 21.7±1.94   | 26.7±0.57   | 23.9±0.25   | 15.4±2.47   | 21.1±1.93   | 22.8±1.05   | 22.5±1.80   | 9.23±1.89   | 12.1±0.87  | 18±0.85    | 21.9±1.59   |
|                                |                              | Ad          | Ac          | Aa          | Ab          | Ab          | Aa          | Ba          | Aa          | Bd          | Bc         | Cb         | Aa          |
| F <sub>v</sub> /F <sub>m</sub> | Tilling                      | 0.69±0.016  | 0.72±0.013  | 0.73±0.012  | 0.72±0.011  | 0.64±0.0081 | 0.72±0.0024 | 0.73±0.0049 | 0.74±0.003  | 0.62±0.005  | 0.71±0.013 | 0.71±0.022 | 0.70±0.012  |
|                                |                              | Ab          | Aa          | Aa          | ABa         | Bd          | Ac          | Ab          | Aa          | Cb          | Aa         | Aa         | Ba          |
|                                | Filling                      | 0.75±0.0035 | 0.75±0.017  | 0.75±0.0078 | 0.78±0.0081 | 0.72±0.0066 | 0.78±0.0085 | 0.79±0.0026 | 0.80±0.0042 | 0.70±0.0051 | 0.75±0.014 | 0.78±0.011 | 0.77±0.0074 |
|                                |                              | Ab          | Bb          | Bb          | Ba          | Bc          | Ab          | Aab         | Aa          | Cc          | Bb         | Aa         | Bab         |
|                                | Maturity                     | 0.47±0.054  | 0.43±0.077  | 0.48±0.023  | 0.45±0.04   | 0.39±0.034  | 0.38±0.05   | 0.36±0.056  | 0.46±0.035  | 0.34±0.058  | 0.49±0.033 | 0.52±0.1   | 0.56±0.091  |
|                                |                              | Aa          | Aa          | ABa         | Aa          | ABab        | Ab          | Bb          | Aa          | Bb          | Aa         | Aa         | Aa          |

S-Cd, slightly contaminated soil (1 mg kg<sup>-1</sup>); M-Cd, moderately contaminated soil (2 mg kg<sup>-1</sup>); H-Cd, highly contaminated soil (4 mg kg<sup>-1</sup>). Pn, net photosynthetic rate (μmol mol<sup>-1</sup>); Tr, transpiration rate (μmol mol<sup>-1</sup>); Ci, substomatal CO<sub>2</sub> concentration (mol m<sup>-2</sup> s<sup>-1</sup>); gs, stomatal conductance (mol m<sup>-2</sup> s<sup>-1</sup>); SPAD, soil and plant analysis development; F<sub>v</sub>/F<sub>m</sub>, maximal photochemical efficiency of PS II. Lowercase letters indicate significant differences in different MBPH levels under the same Cd-contaminated soil; capital letters indicate significant differences among different Cd-contaminated soils at the same level of MBPH ( $p < 0.05$ , Duncan test and Kruskal–Wallis test).

**Table S4** Effects of application of mineral based potassium humate (MBPH) on transfer factors (TFs) of Cd between different organs of rice under different soil contaminated levels.

| Soil Cd<br>contaminated<br>level | MBPH<br>dose | TF <sub>root-stem</sub> | TF <sub>stem-ordinary leaf</sub> | TF <sub>stem-flag leaf</sub> | TF <sub>stem-brown rice</sub> | TF <sub>ordinary leaf-brown rice</sub> | TF <sub>flag leaf-brown rice</sub> |
|----------------------------------|--------------|-------------------------|----------------------------------|------------------------------|-------------------------------|----------------------------------------|------------------------------------|
| S-Cd                             | 0% (CK)      | 0.21±0.054ABb           | 0.37±0.12Aa                      | 0.22±0.047Ba                 | 0.29±0.064Aa                  | 0.78±0.066Aa                           | 1.31±0.15Aa                        |
|                                  | 0.25%        | 0.27±0.024Bab           | 0.26±0.019Ba                     | 0.22±0.045Ba                 | 0.17±0.018Ba                  | 0.66±0.056Abc                          | 0.78±0.11Abc                       |
|                                  | 0.50%        | 0.6±0.17Aa              | 0.31±0.016Ba                     | 0.25±0.016Ba                 | 0.18±0.005Ba                  | 0.59±0.023Bc                           | 0.73±0.07A1c                       |
|                                  | 1%           | 0.5±0.049Aa             | 0.28±0.066Ba                     | 0.21±0.064Ba                 | 0.21±0.054Ba                  | 0.72±0.046Bab                          | 1.01±0.19Ab                        |
| M-Cd                             | 0% (CK)      | 0.29±0.039Ab            | 0.33±0.02Aa                      | 0.24±0.017Ba                 | 0.20±0.022Ba                  | 0.61±0.037Bb                           | 0.85±0.093Ba                       |
|                                  | 0.25%        | 0.36±0.041Aa            | 0.28±0.05Bab                     | 0.19±0.040Bab                | 0.12±0.021Cb                  | 0.44±0.035Bc                           | 0.66±0.091Ab                       |
|                                  | 0.50%        | 0.28±0.01Ab             | 0.18±0.008Cb                     | 0.20±0.005Cab                | 0.14±0.019Cb                  | 0.74±0.072Aa                           | 0.68±0.094Ab                       |
|                                  | 1%           | 0.35±0.027Ba            | 0.18±0.003Cb                     | 0.16±0.004Bb                 | 0.15±0.011Cb                  | 0.82±0.051Aa                           | 0.93±0.061Aa                       |
| H-Cd                             | 0% (CK)      | 0.20±0.013Bc            | 0.35±0.027Ac                     | 0.30±0.025Ac                 | 0.23±0.011ABc                 | 0.64±0.027Ba                           | 0.74±0.053Ba                       |
|                                  | 0.25%        | 0.25±0.038Bbc           | 0.43±0.03Ab                      | 0.38±0.016Ab                 | 0.25±0.012Abc                 | 0.59±0.035Aab                          | 0.67±0.044Aab                      |
|                                  | 0.50%        | 0.28±0.052Ab            | 0.48±0.023Aab                    | 0.46±0.013Aa                 | 0.27±0.019Aab                 | 0.56±0.032Bb                           | 0.59±0.03Ab                        |
|                                  | 1%           | 0.44±0.033Aa            | 0.53±0.045Aa                     | 0.48±0.041Aa                 | 0.29±0.013Aa                  | 0.54±0.024Cb                           | 0.60±0.027Bb                       |

S-Cd, slightly contaminated soil (1 mg kg<sup>-1</sup>); M-Cd, moderately contaminated soil (2 mg kg<sup>-1</sup>); H-Cd, highly contaminated soil (4 mg kg<sup>-1</sup>). Lowercase letters indicate significant differences in different MBPH levels under the same Cd-contaminated soil; capital letters indicate significant differences among different Cd-contaminated soils at the same level of MBPH ( $p < 0.05$ , Duncan test and Kruskal–Wallis test).

**Table S5** Spearman correlation among soil solution chemistry, minerals in brown rice, photosynthetic and chlorophyll fluorescence characteristics, enzyme activity of leaves, soil DTPA-Cd and Cd in brown rice under S-Cd soils.

|                  | TpH                     | FpH                                  | MpH                              | TDOC                              | FDOC                                      | MDOC                                  | TK        | FK        | MK        | Fe in<br>brown<br>rice | Mn in<br>brown<br>rice | Cu in<br>brown<br>rice | Zn in<br>brown<br>rice | K in<br>brown<br>rice |
|------------------|-------------------------|--------------------------------------|----------------------------------|-----------------------------------|-------------------------------------------|---------------------------------------|-----------|-----------|-----------|------------------------|------------------------|------------------------|------------------------|-----------------------|
| Cd in brown rice | -0.354                  | -0.860***                            | -0.713**                         | -0.874***                         | -0.406                                    | -0.706*                               | -0.958*** | -0.853*** | -0.860*** | 0.531                  | -0.021                 | -0.811**               | -0.783**               | -0.860***             |
| TpH              | 1                       | 0.473                                | 0.035                            | 0.277                             | 0.382                                     | 0.263                                 | 0.487     | 0.48      | 0.242     | -0.263                 | -0.088                 | 0.347                  | 0.256                  | 0.333                 |
| FpH              |                         | 1                                    | 0.755**                          | 0.650*                            | 0.413                                     | 0.552                                 | 0.818**   | 0.797**   | 0.692*    | -0.601*                | -0.028                 | 0.657*                 | 0.657*                 | 0.713**               |
| MpH              |                         |                                      | 1                                | 0.615*                            | 0.399                                     | 0.587*                                | 0.650*    | 0.524     | 0.734**   | -0.455                 | -0.07                  | 0.385                  | 0.685*                 | 0.678*                |
| TDOC             |                         |                                      |                                  | 1                                 | 0.413                                     | 0.629*                                | 0.839***  | 0.650*    | 0.839***  | -0.273                 | 0.196                  | 0.615*                 | 0.783**                | 0.944***              |
| FDOC             |                         |                                      |                                  |                                   | 1                                         | 0.497                                 | 0.497     | 0.357     | 0.413     | 0.091                  | 0.483                  | 0.105                  | 0.531                  | 0.503                 |
| MDOC             |                         |                                      |                                  |                                   |                                           | 1                                     | 0.790**   | 0.462     | 0.629*    | -0.657*                | -0.259                 | 0.469                  | 0.720**                | 0.622*                |
| TK               |                         |                                      |                                  |                                   |                                           |                                       | 1         | 0.818**   | 0.867***  | -0.545                 | -0.007                 | 0.797**                | 0.804**                | 0.846***              |
| FK               |                         |                                      |                                  |                                   |                                           |                                       |           | 1         | 0.811**   | -0.392                 | 0.154                  | 0.755**                | 0.615*                 | 0.566                 |
| MK               |                         |                                      |                                  |                                   |                                           |                                       |           |           | 1         | -0.329                 | 0.161                  | 0.629*                 | 0.762**                | 0.769**               |
| Fe in brown rice |                         |                                      |                                  |                                   |                                           |                                       |           |           |           | 1                      | 0.678*                 | -0.483                 | -0.322                 | -0.315                |
| Mn in brown rice |                         |                                      |                                  |                                   |                                           |                                       |           |           |           |                        | 1                      | 0.021                  | 0.231                  | 0.147                 |
| Cu in brown rice |                         |                                      |                                  |                                   |                                           |                                       |           |           |           |                        |                        | 1                      | 0.706*                 | 0.580*                |
| Zn in brown rice |                         |                                      |                                  |                                   |                                           |                                       |           |           |           |                        |                        |                        | 1                      | 0.741**               |
| K in brown rice  |                         |                                      |                                  |                                   |                                           |                                       |           |           |           |                        |                        |                        |                        | 1                     |
|                  | TF <sub>root-stem</sub> | TF <sub>stem</sub><br>-ordinary leaf | TF <sub>stem</sub><br>-flag leaf | TF <sub>stem</sub><br>-brown rice | TF <sub>ordinary</sub><br>leaf-brown rice | TF <sub>flag</sub><br>leaf-brown rice | TPn       | FPn       | MPn       | TTr                    | FTr                    | MTr                    | TCi                    | FCi                   |
| Cd in brown rice | -0.776**                | 0.28                                 | -0.049                           | 0.378                             | 0.238                                     | 0.294                                 | -0.552    | -0.14     | -0.643*   | -0.503                 | -0.413                 | -0.594*                | -0.056                 | -0.238                |
| TpH              | 0.259                   | -0.361                               | 0.14                             | -0.368                            | -0.102                                    | -0.326                                | 0.424     | 0.193     | 0.361     | 0.116                  | 0.221                  | 0.609*                 | -0.294                 | 0.077                 |
| FpH              | 0.650*                  | -0.294                               | -0.119                           | -0.448                            | -0.105                                    | -0.168                                | 0.343     | 0.182     | 0.755**   | 0.238                  | 0.329                  | 0.601*                 | 0.028                  | 0.21                  |



Continued Table S5.

|                                         | TF <sub>root-stem</sub> | TF <sub>stem</sub><br>-ordinary leaf | TF <sub>stem</sub><br>-flag leaf | TF <sub>stem</sub><br>-brown rice | TF <sub>ordinary</sub><br>leaf-brown rice | TF <sub>flag</sub><br>leaf-brown rice | TPn      | FPn    | MPn    | TTr    | FTr     | MTr     | TCi    | FCi    |
|-----------------------------------------|-------------------------|--------------------------------------|----------------------------------|-----------------------------------|-------------------------------------------|---------------------------------------|----------|--------|--------|--------|---------|---------|--------|--------|
| MpH                                     | 0.678*                  | 0.014                                | -0.252                           | -0.252                            | -0.189                                    | 0.098                                 | 0.266    | 0.203  | 0.503  | 0.21   | 0.42    | 0.133   | -0.014 | 0.49   |
| TDOC                                    | 0.853***                | -0.294                               | 0.091                            | -0.371                            | -0.371                                    | -0.35                                 | 0.636*   | 0.042  | 0.427  | 0.671* | 0.378   | 0.406   | 0.056  | 0.28   |
| FDOC                                    | 0.629*                  | -0.329                               | -0.035                           | -0.706*                           | -0.678*                                   | -0.622*                               | 0.517    | 0.392  | 0.399  | 0.266  | 0.273   | 0.608*  | -0.231 | 0.014  |
| MDOC                                    | 0.762**                 | 0.042                                | 0.021                            | -0.154                            | -0.196                                    | -0.098                                | 0.427    | 0.42   | 0.434  | 0.462  | 0.51    | 0.371   | 0.014  | 0.287  |
| TK                                      | 0.797**                 | -0.238                               | 0.175                            | -0.315                            | -0.231                                    | -0.378                                | 0.685*   | 0.154  | 0.594* | 0.559  | 0.427   | 0.615*  | 0      | 0.238  |
| FK                                      | 0.448                   | -0.469                               | 0.07                             | -0.399                            | -0.014                                    | -0.28                                 | 0.462    | 0.077  | 0.399  | 0.462  | 0.259   | 0.629*  | 0.217  | 0.105  |
| MK                                      | 0.678*                  | -0.266                               | 0.119                            | -0.203                            | -0.098                                    | -0.231                                | 0.636*   | -0.063 | 0.259  | 0.664* | 0.287   | 0.294   | 0.21   | 0.294  |
| Fe in brown rice                        | -0.28                   | -0.301                               | -0.021                           | -0.238                            | -0.245                                    | -0.315                                | -0.007   | -0.175 | -0.517 | 0.049  | -0.224  | -0.175  | 0.07   | -0.098 |
| Mn in brown rice                        | 0.154                   | -0.35                                | 0.259                            | -0.469                            | -0.497                                    | -0.720**                              | 0.413    | -0.028 | -0.147 | 0.364  | -0.056  | 0.315   | 0.119  | -0.203 |
| Cu in brown rice                        | 0.51                    | -0.049                               | 0.448                            | -0.098                            | -0.091                                    | -0.392                                | 0.629*   | 0.189  | 0.462  | 0.49   | 0.503   | 0.622*  | 0.063  | 0.252  |
| Zn in brown rice                        | 0.867***                | -0.049                               | 0.231                            | -0.336                            | -0.35                                     | -0.385                                | 0.713**  | 0.497  | 0.35   | 0.706* | 0.762** | 0.503   | 0.112  | 0.559  |
| K in brown rice                         | 0.888***                | -0.196                               | 0.091                            | -0.392                            | -0.503                                    | -0.413                                | 0.657*   | 0.028  | 0.629* | 0.476  | 0.336   | 0.448   | -0.189 | 0.231  |
| TF <sub>root-stem</sub>                 | 1                       | -0.189                               | -0.014                           | -0.49                             | -0.49                                     | -0.392                                | 0.615*   | 0.371  | 0.559  | 0.601* | 0.601*  | 0.49    | -0.014 | 0.441  |
| TF <sub>stem-ordinary leaf</sub>        |                         | 1                                    | 0.455                            | 0.734**                           | -0.049                                    | 0.231                                 | -0.014   | 0.091  | -0.119 | -0.343 | 0.098   | -0.441  | -0.434 | 0.07   |
| TF <sub>stem-flag leaf</sub>            |                         |                                      | 1                                | 0.441                             | -0.189                                    | -0.559                                | 0.678*   | -0.112 | -0.161 | 0.266  | 0.056   | 0.154   | -0.259 | -0.168 |
| TF <sub>stem-brown rice</sub>           |                         |                                      |                                  | 1                                 | 0.503                                     | 0.434                                 | -0.133   | -0.406 | -0.469 | -0.175 | -0.273  | -0.692* | -0.021 | -0.077 |
| TF <sub>ordinary leaf- brown rice</sub> |                         |                                      |                                  |                                   | 1                                         | 0.671*                                | -0.469   | -0.301 | -0.42  | 0      | -0.231  | -0.448  | 0.629* | 0.084  |
| TF <sub>flag leaf-brown rice</sub>      |                         |                                      |                                  |                                   |                                           | 1                                     | -0.755** | -0.07  | -0.266 | -0.364 | -0.098  | -0.692* | 0.252  | 0.259  |
| TPn                                     |                         |                                      |                                  |                                   |                                           |                                       | 1        | 0.07   | 0.175  | 0.636* | 0.385   | 0.476   | -0.203 | 0.196  |
| FPn                                     |                         |                                      |                                  |                                   |                                           |                                       |          | 1      | 0.196  | 0.119  | 0.832** | 0.441   | -0.042 | 0.517  |
| MPn                                     |                         |                                      |                                  |                                   |                                           |                                       |          |        | 1      | -0.175 | 0.189   | 0.636*  | -0.399 | -0.049 |

Continued Table S5.

|                         | TF <sub>root-stem</sub> | TF <sub>stem</sub><br>-ordinary leaf | TF <sub>stem</sub><br>-flag leaf | TF <sub>stem</sub><br>-brown rice | TF <sub>ordinary</sub><br>leaf-brown rice | TF <sub>flag</sub><br>leaf-brown rice | TPn      | FPn                             | MPn                             | TTr                             | FTr    | MTr    | TCi      | FCi             |
|-------------------------|-------------------------|--------------------------------------|----------------------------------|-----------------------------------|-------------------------------------------|---------------------------------------|----------|---------------------------------|---------------------------------|---------------------------------|--------|--------|----------|-----------------|
| TTr                     |                         |                                      |                                  |                                   |                                           |                                       |          |                                 |                                 | 1                               | 0.441  | 0.252  | 0.559    | 0.385           |
| FTr                     |                         |                                      |                                  |                                   |                                           |                                       |          |                                 |                                 |                                 | 1      | 0.371  | 0.042    | 0.825**         |
| MTr                     |                         |                                      |                                  |                                   |                                           |                                       |          |                                 |                                 |                                 |        | 1      | -0.119   | -0.077          |
| TCi                     |                         |                                      |                                  |                                   |                                           |                                       |          |                                 |                                 |                                 |        |        | 1        | 0.182           |
| FCi                     |                         |                                      |                                  |                                   |                                           |                                       |          |                                 |                                 |                                 |        |        |          | 1               |
|                         | MCi                     | Tgs                                  | Fgs                              | Mgs                               | TSPAD                                     | FSPAD                                 | MSPAD    | TF <sub>v</sub> /F <sub>m</sub> | FF <sub>v</sub> /F <sub>m</sub> | MF <sub>v</sub> /F <sub>m</sub> | TSOD   | TPOD   | TCAT     | Soil<br>DTPA-Cd |
| Cd in brown rice        | 0                       | -0.455                               | -0.392                           | -0.594*                           | -0.743**                                  | -0.755**                              | -0.720** | -0.51                           | -0.716**                        | 0.186                           | -0.294 | -0.448 | 0.399    | 0.594*          |
| TpH                     | 0.256                   | 0.137                                | 0.189                            | 0.609*                            | 0.188                                     | 0.2                                   | 0.228    | 0.298                           | 0.541                           | 0.402                           | -0.161 | 0.41   | -0.158   | 0.053           |
| FpH                     | -0.014                  | 0.217                                | 0.322                            | 0.601*                            | 0.578*                                    | 0.566                                 | 0.441    | 0.196                           | 0.878***                        | -0.025                          | 0.007  | 0.441  | -0.413   | -0.476          |
| MpH                     | -0.385                  | 0.196                                | 0.462                            | 0.133                             | 0.473                                     | 0.497                                 | 0.385    | -0.035                          | 0.667*                          | -0.182                          | 0.014  | 0.35   | -0.357   | -0.594*         |
| TDOC                    | -0.147                  | 0.615*                               | 0.343                            | 0.406                             | 0.799**                                   | 0.769**                               | 0.839**  | 0.622*                          | 0.579*                          | -0.095                          | 0.378  | 0.385  | -0.231   | -0.615*         |
| FDOC                    | 0.315                   | 0.231                                | 0.196                            | 0.608*                            | 0.354                                     | 0.678*                                | 0.573    | 0.497                           | 0.247                           | -0.06                           | 0.196  | 0.517  | 0.364    | -0.545          |
| MDOC                    | -0.133                  | 0.357                                | 0.483                            | 0.371                             | 0.487                                     | 0.727**                               | 0.608*   | 0.413                           | 0.571                           | -0.112                          | 0.357  | 0.126  | -0.469   | -0.427          |
| TK                      | 0.049                   | 0.524                                | 0.406                            | 0.615*                            | 0.701*                                    | 0.776**                               | 0.734**  | 0.524                           | 0.723**                         | -0.063                          | 0.322  | 0.538  | -0.378   | -0.559          |
| FK                      | 0.287                   | 0.476                                | 0.259                            | 0.629*                            | 0.438                                     | 0.469                                 | 0.42     | 0.385                           | 0.547                           | -0.319                          | 0.007  | 0.643* | -0.238   | -0.413          |
| MK                      | -0.084                  | 0.685*                               | 0.315                            | 0.294                             | 0.536                                     | 0.587*                                | 0.580*   | 0.336                           | 0.54                            | -0.284                          | 0.189  | 0.678* | -0.252   | -0.566          |
| Fe in brown rice        | 0.308                   | 0.112                                | -0.238                           | -0.175                            | -0.294                                    | -0.259                                | -0.126   | 0.021                           | -0.660*                         | -0.137                          | -0.175 | 0.119  | 0.874*** | 0.042           |
| Mn in brown rice        | 0.566                   | 0.399                                | -0.126                           | 0.315                             | 0.256                                     | 0.315                                 | 0.343    | 0.42                            | -0.342                          | -0.123                          | 0.175  | 0.51   | 0.853*** | -0.531          |
| Cu in brown rice        | 0.315                   | 0.469                                | 0.483                            | 0.622*                            | 0.715**                                   | 0.608*                                | 0.594*   | 0.469                           | 0.497                           | 0.042                           | 0.308  | 0.427  | -0.28    | -0.573          |
| Zn in brown rice        | 0.14                    | 0.650*                               | 0.734**                          | 0.503                             | 0.746**                                   | 0.818**                               | 0.748**  | 0.462                           | 0.536                           | -0.021                          | 0.238  | 0.448  | -0.056   | -0.846**        |
| K in brown rice         | -0.21                   | 0.427                                | 0.294                            | 0.448                             | 0.851***                                  | 0.811**                               | 0.860**  | 0.573                           | 0.667*                          | 0.091                           | 0.441  | 0.406  | -0.245   | -0.636*         |
| TF <sub>root-stem</sub> | -0.091                  | 0.51                                 | 0.552                            | 0.49                              | 0.771**                                   | 0.888***                              | 0.846**  | 0.524                           | 0.653*                          | 0.004                           | 0.322  | 0.28   | -0.126   | -0.713**        |

Continued Table S5

|                                         | MCi     | Tgs      | Fgs      | Mgs      | TSPAD   | FSPAD    | MSPAD    | TF <sub>v</sub> /F <sub>m</sub> | FF <sub>v</sub> /F <sub>m</sub> | MF <sub>v</sub> /F <sub>m</sub> | TSOD   | TPOD    | TCAT    | Soil<br>DTPA-Cd |
|-----------------------------------------|---------|----------|----------|----------|---------|----------|----------|---------------------------------|---------------------------------|---------------------------------|--------|---------|---------|-----------------|
| TF <sub>stem-ordinary leaf</sub>        | -0.301  | -0.35    | 0.112    | -0.441   | 0.081   | -0.077   | -0.098   | -0.238                          | -0.243                          | 0.497                           | 0.392  | -0.301  | -0.196  | -0.112          |
| TF <sub>stem-flag leaf</sub>            | 0.385   | 0.315    | 0.014    | 0.154    | 0.396   | 0.252    | 0.336    | 0.385                           | -0.247                          | 0.529                           | 0.587* | 0.378   | 0.196   | -0.343          |
| TF <sub>stem-brown rice</sub>           | -0.364  | -0.112   | -0.196   | -0.692*  | -0.263  | -0.455   | -0.399   | -0.427                          | -0.314                          | 0.277                           | 0.182  | -0.231  | -0.35   | 0.329           |
| TF <sub>ordinary leaf- brown rice</sub> | -0.182  | 0.07     | -0.112   | -0.448   | -0.609* | -0.664*  | -0.713** | -0.671*                         | 0.063                           | -0.228                          | -0.566 | -0.175  | -0.434  | 0.615*          |
| TF <sub>flag leaf-brown rice</sub>      | -0.657* | -0.364   | 0.014    | -0.692*  | -0.56   | -0.643*  | -0.678*  | -0.741**                        | 0.056                           | -0.231                          | -0.517 | -0.566  | -0.580* | 0.566           |
| TPn                                     | 0.308   | 0.664*   | 0.343    | 0.476    | 0.680*  | 0.692*   | 0.762**  | 0.608*                          | 0.229                           | 0.301                           | 0.476  | 0.720** | 0.203   | -0.671*         |
| FPn                                     | 0.336   | 0        | 0.776**  | 0.441    | 0.189   | 0.378    | 0.224    | 0.189                           | 0.162                           | 0.011                           | -0.14  | -0.189  | 0.112   | -0.392          |
| MPn                                     | -0.056  | -0.252   | 0.126    | 0.636*   | 0.606*  | 0.594*   | 0.497    | 0.315                           | 0.709**                         | 0.179                           | 0.28   | 0.077   | -0.364  | -0.343          |
| TTr                                     | 0.224   | 0.979*** | 0.434    | 0.252    | 0.41    | 0.524    | 0.559    | 0.455                           | 0.201                           | -0.256                          | 0.133  | 0.406   | 0.119   | -0.483          |
| FTr                                     | 0.168   | 0.357    | 0.986*** | 0.371    | 0.441   | 0.497    | 0.434    | 0.217                           | 0.363                           | 0.056                           | -0.091 | 0.028   | -0.028  | -0.573          |
| MTr                                     | 0.664*  | 0.189    | 0.266    | 1.000*** | 0.536   | 0.664*   | 0.580*   | 0.664*                          | 0.402                           | 0.035                           | 0.189  | 0.378   | 0.133   | -0.448          |
| TCi                                     | 0.14    | 0.559    | 0.098    | -0.119   | -0.263  | -0.14    | -0.224   | -0.203                          | 0.011                           | -0.648*                         | -0.399 | -0.014  | 0.007   | 0.07            |
| FCi                                     | -0.21   | 0.371    | 0.895*** | -0.077   | 0.154   | 0.126    | 0.119    | -0.217                          | 0.381                           | -0.011                          | -0.413 | 0.028   | -0.126  | -0.322          |
| MCi                                     | 1       | 0.231    | 0.091    | 0.664*   | 0.046   | 0.196    | 0.126    | 0.406                           | -0.286                          | -0.077                          | 0.014  | 0.357   | 0.608*  | -0.245          |
| Tgs                                     |         | 1        | 0.371    | 0.189    | 0.333   | 0.42     | 0.469    | 0.357                           | 0.169                           | -0.231                          | 0.063  | 0.531   | 0.161   | -0.441          |
| Fgs                                     |         |          | 1        | 0.266    | 0.357   | 0.399    | 0.336    | 0.084                           | 0.381                           | 0.018                           | -0.189 | 0.049   | -0.084  | -0.517          |
| Mgs                                     |         |          |          | 1        | 0.536   | 0.664*   | 0.580*   | 0.664*                          | 0.402                           | 0.035                           | 0.189  | 0.378   | 0.133   | -0.448          |
| TSPAD                                   |         |          |          |          | 1       | 0.865*** | 0.904*** | 0.687*                          | 0.445                           | 0.275                           | 0.644* | 0.256   | -0.091  | -0.795**        |
| FSPAD                                   |         |          |          |          |         | 1        | 0.944*** | 0.762**                         | 0.416                           | 0.028                           | 0.622* | 0.308   | 0.021   | -0.811**        |
| MSPAD                                   |         |          |          |          |         |          | 1        | 0.853***                        | 0.328                           | 0.102                           | 0.678* | 0.308   | 0.049   | -0.748**        |
| TF <sub>v</sub> /F <sub>m</sub>         |         |          |          |          |         |          |          | 1                               | 0.021                           | 0.018                           | 0.671* | 0.203   | 0.189   | -0.483          |
| FF <sub>v</sub> /F <sub>m</sub>         |         |          |          |          |         |          |          |                                 | 1                               | 0.141                           | -0.131 | 0.201   | -0.607* | -0.212          |
| MF <sub>v</sub> /F <sub>m</sub>         |         |          |          |          |         |          |          |                                 |                                 | 1                               | 0.238  | -0.014  | -0.032  | -0.021          |

Continued Table S5.

|              | MCi | Tgs | Fgs | Mgs | TSPAD | FSPAD | MSPAD | TF <sub>v</sub> /F <sub>m</sub> | FF <sub>v</sub> /F <sub>m</sub> | MF <sub>v</sub> /F <sub>m</sub> | TSOD | TPOD  | TCAT   | Soil<br>DTPA-Cd |
|--------------|-----|-----|-----|-----|-------|-------|-------|---------------------------------|---------------------------------|---------------------------------|------|-------|--------|-----------------|
| TSOD         |     |     |     |     |       |       |       |                                 |                                 |                                 | 1    | 0.035 | -0.021 | -0.441          |
| TPOD         |     |     |     |     |       |       |       |                                 |                                 |                                 |      | 1     | 0.28   | -0.448          |
| TCAT         |     |     |     |     |       |       |       |                                 |                                 |                                 |      |       | 1      | -0.273          |
| Soil DTPA Cd |     |     |     |     |       |       |       |                                 |                                 |                                 |      |       |        | 1               |

S-Cd, slightly contaminated soil (1 mg kg<sup>-1</sup>); T, Tillering stage; F, Filling stage; M, Maturity stage; pH value, DOC and K concentrations of soil solution; TF, transfer factors (TF) of Cd between different rice organs; Pn, net photosynthetic rate; Tr, transpiration rate; Ci, substomatal CO<sub>2</sub> concentration; gs, stomatal conductance; SPAD, soil and plant analysis development; F<sub>v</sub>/F<sub>m</sub>, chlorophyll fluorescence parameter; SOD, superoxide dismutase; POD, peroxidase, CAT, catalase; \**p*<0.05, \*\**p*<0.01, \*\*\**p*<0.001.

**Table S6** Spearman correlation among soil solution chemistry, minerals in brown rice, photosynthetic and chlorophyll fluorescence characteristics, enzyme activity of leaves, soil DTPA-Cd and Cd in brown rice under M-Cd soils.

|                  | TpH                     | FpH                                  | MpH                              | TDOC                              | FDOC                                      | MDOC                                  | TK        | FK        | MK     | Fe in<br>brown<br>rice | Mn in<br>brown<br>rice | Cu in<br>brown<br>rice | Zn in<br>brown<br>rice | K in<br>brown<br>rice |
|------------------|-------------------------|--------------------------------------|----------------------------------|-----------------------------------|-------------------------------------------|---------------------------------------|-----------|-----------|--------|------------------------|------------------------|------------------------|------------------------|-----------------------|
| Cd in brown rice | -0.41                   | -0.169                               | -0.692*                          | -0.909***                         | -0.762**                                  | -0.594*                               | -0.888*** | -0.881*** | -0.371 | -0.559                 | -0.699*                | -0.762**               | -0.559                 | -0.867**<br>*         |
| TpH              | 1                       | -0.063                               | 0.378                            | 0.357                             | 0.743**                                   | 0.606*                                | 0.581*    | 0.466     | -0.014 | 0.501                  | 0.284                  | 0.529                  | 0.371                  | 0.49                  |
| FpH              |                         | 1                                    | 0.095                            | 0.186                             | 0.218                                     | -0.292                                | 0.116     | 0.243     | 0.671* | 0.278                  | -0.077                 | -0.06                  | 0.517                  | 0.112                 |
| MpH              |                         |                                      | 1                                | 0.811**                           | 0.790**                                   | 0.741**                               | 0.839**   | 0.629*    | 0.133  | 0.476                  | 0.35                   | 0.769**                | 0.650*                 | 0.811**               |
| TDOC             |                         |                                      |                                  | 1                                 | 0.727**                                   | 0.608*                                | 0.923***  | 0.811**   | 0.42   | 0.664*                 | 0.594*                 | 0.748**                | 0.664*                 | 0.923***              |
| FDOC             |                         |                                      |                                  |                                   | 1                                         | 0.804**                               | 0.860***  | 0.755**   | 0.224  | 0.497                  | 0.392                  | 0.699*                 | 0.699*                 | 0.734**               |
| MDOC             |                         |                                      |                                  |                                   |                                           | 1                                     | 0.755**   | 0.650*    | -0.028 | 0.266                  | 0.434                  | 0.713**                | 0.503                  | 0.601*                |
| TK               |                         |                                      |                                  |                                   |                                           |                                       | 1         | 0.888***  | 0.413  | 0.727**                | 0.622*                 | 0.797**                | 0.678*                 | 0.937***              |
| FK               |                         |                                      |                                  |                                   |                                           |                                       |           | 1         | 0.594* | 0.615*                 | 0.671*                 | 0.762**                | 0.629*                 | 0.769**               |
| MK               |                         |                                      |                                  |                                   |                                           |                                       |           |           | 1      | 0.622*                 | 0.245                  | 0.154                  | 0.538                  | 0.322                 |
| Fe in brown rice |                         |                                      |                                  |                                   |                                           |                                       |           |           |        | 1                      | 0.469                  | 0.580*                 | 0.615*                 | 0.748**               |
| Mn in brown rice |                         |                                      |                                  |                                   |                                           |                                       |           |           |        |                        | 1                      | 0.629*                 | 0.49                   | 0.720**               |
| Cu in brown rice |                         |                                      |                                  |                                   |                                           |                                       |           |           |        |                        |                        | 1                      | 0.594*                 | 0.783**               |
| Zn in brown rice |                         |                                      |                                  |                                   |                                           |                                       |           |           |        |                        |                        |                        | 1                      | 0.664*                |
| K in brown rice  |                         |                                      |                                  |                                   |                                           |                                       |           |           |        |                        |                        |                        |                        | 1                     |
|                  | TF <sub>root-stem</sub> | TF <sub>stem</sub><br>-ordinary leaf | TF <sub>stem</sub><br>-flag leaf | TF <sub>stem</sub><br>-brown rice | TF <sub>ordinary</sub><br>leaf-brown rice | TF <sub>flag</sub><br>leaf-brown rice | TPn       | FPn       | MPn    | TTr                    | FTr                    | MTr                    | TCi                    | FCi                   |
| Cd in brown rice | -0.168                  | 0.965***                             | 0.664*                           | 0.573                             | -0.594*                                   | 0.049                                 | 0.147     | -0.517    | -0.51  | 0.196                  | -0.399                 | -0.035                 | 0.455                  | 0.014                 |
| TpH              | -0.004                  | -0.417                               | -0.406                           | -0.056                            | 0.487                                     | 0.207                                 | -0.025    | 0.116     | 0.249  | -0.529                 | -0.249                 | -0.396                 | -0.634*                | -0.186                |
| FpH              | 0.127                   | -0.207                               | -0.401                           | -0.703*                           | -0.271                                    | -0.745**                              | 0.453     | 0.657*    | 0.348  | -0.039                 | 0.689*                 | 0.446                  | -0.439                 | 0.109                 |

Continued Table S6.

|                                         | TF <sub>root-stem</sub> | TF <sub>stem</sub><br>-ordinary leaf | TF <sub>stem</sub><br>-flag leaf | TF <sub>stem</sub><br>-brown rice | TF <sub>ordinary</sub><br>leaf-brown rice | TF <sub>flag</sub><br>leaf-brown rice | TPn    | FPn     | MPn      | TTr    | FTr      | MTr     | TCi    | FCi    |
|-----------------------------------------|-------------------------|--------------------------------------|----------------------------------|-----------------------------------|-------------------------------------------|---------------------------------------|--------|---------|----------|--------|----------|---------|--------|--------|
| MpH                                     | 0.063                   | -0.678*                              | -0.357                           | -0.091                            | 0.811**                                   | 0.14                                  | -0.063 | 0.434   | 0.503    | -0.07  | 0.07     | -0.364  | -0.112 | -0.301 |
| TDOC                                    | 0.294                   | -0.867***                            | -0.685*                          | -0.455                            | 0.685*                                    | 0.091                                 | -0.098 | 0.559   | 0.594*   | -0.168 | 0.336    | -0.105  | -0.315 | -0.126 |
| FDOC                                    | 0.042                   | -0.783**                             | -0.524                           | -0.357                            | 0.671*                                    | -0.028                                | -0.07  | 0.517   | 0.427    | -0.378 | 0.175    | -0.329  | -0.566 | -0.168 |
| MDOC                                    | 0.028                   | -0.643*                              | -0.308                           | -0.014                            | 0.741**                                   | 0.371                                 | -0.301 | 0.182   | 0.238    | -0.196 | -0.196   | -0.580* | -0.084 | -0.252 |
| TK                                      | 0.336                   | -0.853***                            | -0.692*                          | -0.385                            | 0.692*                                    | 0.14                                  | -0.042 | 0.399   | 0.685*   | -0.189 | 0.175    | -0.196  | -0.399 | -0.133 |
| FK                                      | 0.266                   | -0.916***                            | -0.748**                         | -0.657*                           | 0.392                                     | -0.105                                | -0.07  | 0.42    | 0.629*   | -0.154 | 0.35     | 0.091   | -0.35  | 0.063  |
| MK                                      | 0.629*                  | -0.364                               | -0.706*                          | -0.804**                          | -0.28                                     | -0.42                                 | 0.301  | 0.469   | 0.720**  | 0.077  | 0.629*   | 0.552   | -0.224 | 0.273  |
| Fe in brown rice                        | 0.664*                  | -0.455                               | -0.818**                         | -0.357                            | 0.329                                     | 0.154                                 | 0.364  | 0.301   | 0.902*** | -0.014 | 0.196    | 0.14    | -0.42  | 0.077  |
| Mn in brown rice                        | 0.399                   | -0.678*                              | -0.692*                          | -0.287                            | 0.497                                     | 0.35                                  | 0.266  | 0.028   | 0.476    | 0.329  | -0.028   | -0.126  | -0.245 | -0.049 |
| Cu in brown rice                        | 0.049                   | -0.776**                             | -0.566                           | -0.203                            | 0.699*                                    | 0.245                                 | -0.042 | 0.329   | 0.517    | -0.014 | 0.014    | -0.14   | -0.119 | -0.077 |
| Zn in brown rice                        | 0.427                   | -0.587*                              | -0.762**                         | -0.448                            | 0.49                                      | 0.014                                 | 0.462  | 0.629*  | 0.643*   | 0.175  | 0.287    | -0.182  | -0.329 | -0.112 |
| K in brown rice                         | 0.357                   | -0.790**                             | -0.685*                          | -0.287                            | 0.762**                                   | 0.224                                 | 0.112  | 0.364   | 0.678*   | -0.042 | 0.091    | -0.217  | -0.392 | -0.252 |
| TF <sub>root-stem</sub>                 | 1                       | -0.049                               | -0.636*                          | -0.203                            | 0.007                                     | 0.315                                 | 0.517  | -0.014  | 0.755**  | 0.441  | 0.147    | 0.112   | -0.098 | 0.21   |
| TF <sub>stem-ordinary leaf</sub>        |                         | 1                                    | 0.657*                           | 0.608*                            | -0.559                                    | 0.098                                 | 0.168  | -0.517  | -0.427   | 0.217  | -0.413   | 0       | 0.42   | -0.035 |
| TF <sub>stem-flag leaf</sub>            |                         |                                      | 1                                | 0.615*                            | -0.28                                     | -0.084                                | -0.427 | -0.399  | -0.776** | -0.098 | -0.413   | -0.147  | 0.497  | -0.273 |
| TF <sub>stem-brown rice</sub>           |                         |                                      |                                  | 1                                 | 0.231                                     | 0.664*                                | -0.014 | -0.685* | -0.371   | 0.21   | -0.797** | -0.594* | 0.441  | -0.259 |
| TF <sub>ordinary leaf- brown rice</sub> |                         |                                      |                                  |                                   | 1                                         | 0.545                                 | -0.049 | 0.175   | 0.231    | -0.042 | -0.252   | -0.685* | -0.182 | -0.378 |
| TF <sub>flag leaf-brown rice</sub>      |                         |                                      |                                  |                                   |                                           | 1                                     | 0.091  | -0.517  | 0.084    | 0.315  | -0.636*  | -0.636* | 0.245  | -0.084 |
| TPn                                     |                         |                                      |                                  |                                   |                                           |                                       | 1      | -0.063  | 0.49     | 0.636* | 0.021    | 0.035   | -0.224 | 0.126  |
| FPn                                     |                         |                                      |                                  |                                   |                                           |                                       |        | 1       | 0.217    | -0.287 | 0.650*   | 0.224   | -0.322 | -0.119 |
| MPn                                     |                         |                                      |                                  |                                   |                                           |                                       |        |         | 1        | 0.28   | 0.294    | 0.224   | -0.245 | 0.21   |

Continued Table S6.

|                         | TF <sub>root-stem</sub> | TF <sub>stem</sub><br>-ordinary leaf | TF <sub>stem</sub><br>-flag leaf | TF <sub>stem</sub><br>-brown rice | TF <sub>ordinary</sub><br>leaf-brown rice | TF <sub>flag</sub><br>leaf-brown rice | TPn     | FPn                             | MPn                             | TTr                             | FTr    | MTr     | TCi     | FCi             |
|-------------------------|-------------------------|--------------------------------------|----------------------------------|-----------------------------------|-------------------------------------------|---------------------------------------|---------|---------------------------------|---------------------------------|---------------------------------|--------|---------|---------|-----------------|
| TTr                     |                         |                                      |                                  |                                   |                                           |                                       |         |                                 |                                 | 1                               | -0.105 | 0.049   | 0.469   | 0.14            |
| FTr                     |                         |                                      |                                  |                                   |                                           |                                       |         |                                 |                                 |                                 | 1      | 0.664*  | -0.322  | 0.566           |
| MTr                     |                         |                                      |                                  |                                   |                                           |                                       |         |                                 |                                 |                                 |        | 1       | -0.007  | 0.545           |
| TCi                     |                         |                                      |                                  |                                   |                                           |                                       |         |                                 |                                 |                                 |        |         | 1       | -0.091          |
| FCi                     |                         |                                      |                                  |                                   |                                           |                                       |         |                                 |                                 |                                 |        |         |         | 1               |
|                         | MCi                     | Tgs                                  | Fgs                              | Mgs                               | TSPAD                                     | FSPAD                                 | MSPAD   | TF <sub>v</sub> /F <sub>m</sub> | FF <sub>v</sub> /F <sub>m</sub> | MF <sub>v</sub> /F <sub>m</sub> | TSOD   | TPOD    | TCAT    | Soil<br>DTPA-Cd |
| Cd in brown rice        | 0.287                   | 0.217                                | -0.399                           | -0.035                            | -0.214                                    | -0.909***                             | -0.699* | -0.839**                        | -0.820**                        | -0.182                          | -0.573 | -0.697* | -0.497  | 0.853***        |
| TpH                     | -0.683*                 | -0.578*                              | -0.249                           | -0.396                            | 0.132                                     | 0.620*                                | 0.301   | 0.637*                          | 0.623*                          | 0.018                           | 0.088  | 0.512   | 0.137   | -0.529          |
| FpH                     | 0.183                   | 0.025                                | 0.689*                           | 0.446                             | 0.697*                                    | 0.058                                 | 0.531   | 0.134                           | 0.15                            | -0.422                          | 0.07   | 0.486   | 0.541   | -0.292          |
| MpH                     | -0.615*                 | -0.084                               | 0.07                             | -0.364                            | 0.077                                     | 0.733**                               | 0.594*  | 0.776**                         | 0.757**                         | 0.483                           | 0.545  | 0.641*  | 0.811** | -0.783**        |
| TDOC                    | -0.455                  | -0.189                               | 0.336                            | -0.105                            | 0.235                                     | 0.891***                              | 0.818** | 0.874***                        | 0.865***                        | 0.287                           | 0.399  | 0.655*  | 0.664*  | -0.846**        |
| FDOC                    | -0.636*                 | -0.385                               | 0.175                            | -0.329                            | 0.406                                     | 0.811**                               | 0.643*  | 0.853***                        | 0.830**                         | 0.105                           | 0.545  | 0.799** | 0.594*  | -0.895***       |
| MDOC                    | -0.706*                 | -0.217                               | -0.196                           | -0.580*                           | 0.137                                     | 0.649*                                | 0.42    | 0.727**                         | 0.704*                          | 0.427                           | 0.517  | 0.347   | 0.371   | -0.748**        |
| TK                      | -0.622*                 | -0.21                                | 0.175                            | -0.196                            | 0.242                                     | 0.944***                              | 0.706*  | 0.923***                        | 0.907***                        | 0.371                           | 0.49   | 0.669*  | 0.622*  | -0.888***       |
| FK                      | -0.336                  | -0.161                               | 0.35                             | 0.091                             | 0.406                                     | 0.800**                               | 0.727** | 0.790**                         | 0.778**                         | 0.231                           | 0.601* | 0.515   | 0.517   | -0.881***       |
| MK                      | 0.07                    | 0.154                                | 0.629*                           | 0.552                             | 0.676*                                    | 0.33                                  | 0.587*  | 0.35                            | 0.371                           | 0.014                           | 0.161  | 0.228   | 0.476   | -0.413          |
| Fe in brown rice        | -0.469                  | -0.028                               | 0.196                            | 0.14                              | 0.161                                     | 0.768**                               | 0.580*  | 0.755**                         | 0.771**                         | 0.364                           | 0.049  | 0.452   | 0.552   | -0.559          |
| Mn in brown rice        | -0.357                  | 0.252                                | -0.028                           | -0.126                            | -0.084                                    | 0.649*                                | 0.455   | 0.671*                          | 0.676*                          | 0.364                           | 0.189  | 0.165   | 0.133   | -0.594*         |
| Cu in brown rice        | -0.469                  | -0.07                                | 0.014                            | -0.14                             | -0.088                                    | 0.779**                               | 0.587*  | 0.832**                         | 0.823**                         | 0.538                           | 0.517  | 0.413   | 0.594*  | -0.797**        |
| Zn in brown rice        | -0.545                  | 0.182                                | 0.287                            | -0.182                            | 0.508                                     | 0.600*                                | 0.825** | 0.811**                         | 0.830**                         | 0.231                           | 0.224  | 0.501   | 0.783** | -0.818**        |
| K in brown rice         | -0.601*                 | -0.084                               | 0.091                            | -0.217                            | 0.035                                     | 0.933***                              | 0.671*  | 0.909***                        | 0.900***                        | 0.42                            | 0.301  | 0.651*  | 0.601*  | -0.790**        |
| TF <sub>root-stem</sub> | -0.294                  | 0.462                                | 0.147                            | 0.112                             | 0.207                                     | 0.351                                 | 0.266   | 0.378                           | 0.41                            | 0.364                           | -0.168 | -0.053  | 0.196   | -0.189          |

Continued Table S6.

|                                         | MCi      | Tgs      | Fgs      | Mgs     | TSPAD    | FSPAD    | MSPAD    | TF <sub>v</sub> /F <sub>m</sub> | FF <sub>v</sub> /F <sub>m</sub> | MF <sub>v</sub> /F <sub>m</sub> | TSOD    | TPOD     | TCAT   | Soil<br>DTPA-Cd |
|-----------------------------------------|----------|----------|----------|---------|----------|----------|----------|---------------------------------|---------------------------------|---------------------------------|---------|----------|--------|-----------------|
| TF <sub>stem-ordinary leaf</sub>        | 0.287    | 0.252    | -0.413   | 0       | -0.315   | -0.818** | -0.762** | -0.797**                        | -0.778**                        | -0.091                          | -0.636* | -0.641*  | -0.497 | 0.909***        |
| TF <sub>stem-flag leaf</sub>            | 0.378    | -0.056   | -0.413   | -0.147  | -0.431   | -0.702*  | -0.804** | -0.776**                        | -0.799**                        | -0.105                          | -0.147  | -0.378   | -0.462 | 0.741**         |
| TF <sub>stem-brown rice</sub>           | -0.287   | 0.14     | -0.797** | -0.594* | -0.732** | -0.368   | -0.636*  | -0.35                           | -0.354                          | 0.322                           | -0.336  | -0.441   | -0.343 | 0.51            |
| TF <sub>ordinary leaf- brown rice</sub> | -0.755** | -0.126   | -0.252   | -0.685* | -0.228   | 0.695*   | 0.427    | 0.748**                         | 0.732**                         | 0.42                            | 0.245   | 0.487    | 0.434  | -0.636*         |
| TF <sub>flag leaf-brown rice</sub>      | -0.608*  | 0.203    | -0.636*  | -0.636* | -0.543   | 0.179    | -0.105   | 0.245                           | 0.256                           | 0.531                           | -0.252  | -0.35    | -0.189 | -0.014          |
| TPn                                     | -0.217   | 0.594*   | 0.021    | 0.035   | 0.067    | -0.032   | 0.154    | 0.126                           | 0.165                           | 0.07                            | -0.294  | -0.025   | 0.231  | -0.049          |
| FPn                                     | 0.063    | -0.196   | 0.650*   | 0.224   | 0.592*   | 0.414    | 0.699*   | 0.497                           | 0.501                           | -0.161                          | 0.245   | .648*    | 0.678* | -0.552          |
| MPn                                     | -0.385   | 0.28     | 0.294    | 0.224   | 0.21     | 0.653*   | 0.524    | 0.657*                          | 0.673*                          | 0.469                           | 0.259   | 0.347    | 0.636* | -0.559          |
| TTr                                     | 0.056    | 0.979*** | -0.105   | 0.049   | -0.291   | -0.218   | -0.126   | -0.084                          | -0.053                          | 0.497                           | -0.049  | -0.487   | 0.084  | 0.126           |
| FTr                                     | 0.427    | -0.056   | 1.000**  | 0.664*  | 0.634*   | 0.189    | 0.531    | 0.147                           | 0.151                           | -0.413                          | 0.427   | 0.42     | 0.399  | -0.357          |
| MTr                                     | 0.783**  | 0.119    | 0.664*   | 1.000** | 0.179    | -0.119   | -0.007   | -0.252                          | -0.242                          | -0.189                          | 0.168   | -0.046   | 0.028  | 0.175           |
| TCi                                     | 0.273    | 0.503    | -0.322   | -0.007  | -0.406   | -0.516   | -0.385   | -0.448                          | -0.438                          | 0.517                           | -0.035  | -0.743** | -0.077 | 0.427           |
| FCi                                     | 0.322    | 0.084    | 0.566    | 0.545   | 0.203    | -0.091   | 0.077    | -0.133                          | -0.123                          | -0.266                          | 0.329   | -0.168   | -0.098 | -0.042          |
| MCi                                     | 1        | 0.133    | 0.427    | 0.783** | -0.028   | -0.54    | -0.364   | -0.657*                         | -0.655*                         | -0.343                          | 0.007   | -0.315   | -0.329 | 0.538           |
| Tgs                                     |          | 1        | -0.056   | 0.119   | -0.214   | -0.242   | -0.154   | -0.112                          | -0.081                          | 0.51                            | -0.042  | -0.473   | 0.119  | 0.161           |
| Fgs                                     |          |          | 1        | 0.664*  | 0.634*   | 0.189    | 0.531    | 0.147                           | 0.151                           | -0.413                          | 0.427   | 0.42     | 0.399  | -0.357          |
| Mgs                                     |          |          |          | 1       | 0.179    | -0.119   | -0.007   | -0.252                          | -0.242                          | -0.189                          | 0.168   | -0.046   | 0.028  | 0.175           |
| TSPAD                                   |          |          |          |         | 1        | 0.114    | 0.585*   | 0.217                           | 0.225                           | -0.48                           | 0.203   | 0.361    | 0.336  | -0.448          |
| FSPAD                                   |          |          |          |         |          | 1        | 0.625*   | 0.937***                        | 0.923***                        | 0.333                           | 0.396   | 0.710**  | 0.512  | -0.807**        |
| MSPAD                                   |          |          |          |         |          |          | 1        | 0.748**                         | 0.760**                         | -0.049                          | 0.266   | 0.55     | 0.699* | -0.853***       |
| TF <sub>v</sub> /F <sub>m</sub>         |          |          |          |         |          |          |          | 1                               | 0.998***                        | 0.371                           | 0.343   | 0.637*   | 0.629* | -0.895***       |
| FF <sub>v</sub> /F <sub>m</sub>         |          |          |          |         |          |          |          |                                 | 1                               | 0.375                           | 0.308   | 0.612*   | 0.634* | -0.886***       |
| MF <sub>v</sub> /F <sub>m</sub>         |          |          |          |         |          |          |          |                                 |                                 | 1                               | 0.175   | -0.186   | 0.343  | -0.161          |



Continued Table S6.

|              | M <sub>Ci</sub> | T <sub>gs</sub> | F <sub>gs</sub> | M <sub>gs</sub> | TSPAD | FSPAD | MSPAD | TF <sub>v</sub> /F <sub>m</sub> | FF <sub>v</sub> /F <sub>m</sub> | MF <sub>v</sub> /F <sub>m</sub> | TSOD | TPOD  | TCAT  | Soil<br>DTPA-Cd |
|--------------|-----------------|-----------------|-----------------|-----------------|-------|-------|-------|---------------------------------|---------------------------------|---------------------------------|------|-------|-------|-----------------|
| TSOD         |                 |                 |                 |                 |       |       |       |                                 |                                 |                                 | 1    | 0.385 | 0.427 | -0.594*         |
| TPOD         |                 |                 |                 |                 |       |       |       |                                 |                                 |                                 |      | 1     | 0.574 | -0.648*         |
| TCAT         |                 |                 |                 |                 |       |       |       |                                 |                                 |                                 |      |       | 1     | -0.678*         |
| Soil DTPA Cd |                 |                 |                 |                 |       |       |       |                                 |                                 |                                 |      |       |       | 1               |

M-Cd, moderately contaminated soil (2 mg kg<sup>-1</sup>); T, Tillering stage; F, Filling stage; M, Maturity stage; pH value, DOC and K concentrations of soil solution; TF, transfer factors (TF) of Cd between different rice organs; Pn, net photosynthetic rate; Tr, transpiration rate; Ci, substomatal CO<sub>2</sub> concentration; gs, stomatal conductance; SPAD, soil and plant analysis development; F<sub>v</sub>/F<sub>m</sub>, chlorophyll fluorescence parameter; SOD, superoxide dismutase; POD, peroxidase, CAT, catalase; \**p*<0.05, \*\**p*<0.01, \*\*\**p*<0.001.

**Table S7** Spearman correlation among soil solution chemistry, minerals in brown rice, photosynthetic and chlorophyll fluorescence characteristics, enzyme activity of leaves, soil DTPA-Cd and Cd in brown rice under H-Cd soils.

|                  | TpH                     | FpH                                  | MpH                              | TDOC                              | FDOC                                      | MDOC                                  | TK        | FK        | MK        | Fe in<br>brown<br>rice | Mn in<br>brown<br>rice | Cu in<br>brown<br>rice | Zn in<br>brown<br>rice | K in<br>brown<br>rice |
|------------------|-------------------------|--------------------------------------|----------------------------------|-----------------------------------|-------------------------------------------|---------------------------------------|-----------|-----------|-----------|------------------------|------------------------|------------------------|------------------------|-----------------------|
| Cd in brown rice | -0.51                   | -0.860***                            | -0.832**                         | -0.797**                          | -0.776**                                  | -0.860***                             | -0.916*** | -0.916*** | -0.853*** | -0.545                 | -0.699*                | -0.881***              | -0.825**               | -0.839**              |
| TpH              | 1                       | 0.428                                | 0.586*                           | 0.224                             | 0.601*                                    | 0.441                                 | 0.476     | 0.462     | 0.434     | -0.07                  | -0.035                 | 0.615*                 | 0.559                  | 0.287                 |
| FpH              |                         | 1                                    | 0.775**                          | 0.754**                           | 0.730**                                   | 0.695*                                | 0.874***  | 0.937***  | 0.905***  | 0.284                  | 0.586*                 | 0.800**                | 0.649*                 | 0.768**               |
| MpH              |                         |                                      | 1                                | 0.705*                            | 0.635*                                    | 0.842**                               | 0.874***  | 0.807**   | 0.698*    | 0.2                    | 0.512                  | 0.884***               | 0.765**                | 0.853***              |
| TDOC             |                         |                                      |                                  | 1                                 | 0.650*                                    | 0.832**                               | 0.909***  | 0.888***  | 0.692*    | 0.483                  | 0.762**                | 0.671*                 | 0.790**                | 0.853***              |
| FDOC             |                         |                                      |                                  |                                   | 1                                         | 0.776**                               | 0.818**   | 0.783**   | 0.762**   | 0.203                  | 0.406                  | 0.748**                | 0.538                  | 0.573                 |
| MDOC             |                         |                                      |                                  |                                   |                                           | 1                                     | 0.902***  | 0.860***  | 0.699*    | 0.483                  | 0.664*                 | 0.811**                | 0.741**                | 0.881***              |
| TK               |                         |                                      |                                  |                                   |                                           |                                       | 1         | 0.944***  | 0.832**   | 0.385                  | 0.713**                | 0.818**                | 0.818**                | 0.874***              |
| FK               |                         |                                      |                                  |                                   |                                           |                                       |           | 1         | 0.881***  | 0.441                  | 0.692*                 | 0.811**                | 0.776**                | 0.867***              |
| MK               |                         |                                      |                                  |                                   |                                           |                                       |           |           | 1         | 0.224                  | 0.455                  | 0.762**                | 0.566                  | 0.615*                |
| Fe in brown rice |                         |                                      |                                  |                                   |                                           |                                       |           |           |           | 1                      | 0.783**                | 0.266                  | 0.517                  | 0.587*                |
| Mn in brown rice |                         |                                      |                                  |                                   |                                           |                                       |           |           |           |                        | 1                      | 0.385                  | 0.706*                 | 0.811**               |
| Cu in brown rice |                         |                                      |                                  |                                   |                                           |                                       |           |           |           |                        |                        | 1                      | 0.678*                 | 0.762**               |
| Zn in brown rice |                         |                                      |                                  |                                   |                                           |                                       |           |           |           |                        |                        |                        | 1                      | 0.769**               |
| K in brown rice  |                         |                                      |                                  |                                   |                                           |                                       |           |           |           |                        |                        |                        |                        | 1                     |
|                  | TF <sub>root-stem</sub> | TF <sub>stem</sub><br>-ordinary leaf | TF <sub>stem</sub><br>-flag leaf | TF <sub>stem</sub><br>-brown rice | TF <sub>ordinary</sub><br>leaf-brown rice | TF <sub>flag</sub><br>leaf-brown rice | TPn       | FPn       | MPn       | TTr                    | FTr                    | MTr                    | TCi                    | FCi                   |
| Cd in brown rice | -0.762**                | -0.902***                            | -0.937***                        | -0.804**                          | 0.825**                                   | 0.923***                              | -0.392    | -0.664*   | -0.385    | -0.427                 | -0.098                 | -0.566                 | 0.084                  | 0.552                 |
| TpH              | 0.552                   | 0.545                                | 0.503                            | 0.371                             | -0.748**                                  | -0.462                                | 0.734**   | 0.713**   | 0.601*    | 0.776**                | 0.168                  | 0.559                  | 0.105                  | -0.315                |
| FpH              | 0.723**                 | 0.779**                              | 0.786**                          | 0.768**                           | -0.695*                                   | -0.747**                              | 0.467     | 0.47      | 0.467     | 0.474                  | -0.116                 | 0.807**                | -0.26                  | -0.635*               |

Continued Table S7.

|                                         | TF <sub>root-stem</sub> | TF <sub>stem</sub><br>-ordinary leaf | TF <sub>stem</sub><br>-flag leaf | TF <sub>stem</sub><br>-brown rice | TF <sub>ordinary</sub><br>leaf-brown rice | TF <sub>flag</sub><br>leaf-brown rice | TPn    | FPn     | MPn    | TTr      | FTr    | MTr     | TCi    | FCi     |
|-----------------------------------------|-------------------------|--------------------------------------|----------------------------------|-----------------------------------|-------------------------------------------|---------------------------------------|--------|---------|--------|----------|--------|---------|--------|---------|
| MpH                                     | 0.807**                 | 0.726**                              | 0.747**                          | 0.737**                           | -0.582*                                   | -0.621*                               | 0.533  | 0.796** | 0.46   | 0.639*   | 0.298  | 0.688*  | 0.063  | -0.414  |
| TDOC                                    | 0.769**                 | 0.755**                              | 0.727**                          | 0.790**                           | -0.51                                     | -0.643*                               | 0.259  | 0.441   | 0.084  | 0.294    | 0.287  | 0.413   | -0.119 | -0.385  |
| FDOC                                    | 0.678*                  | 0.713**                              | 0.685*                           | 0.594*                            | -0.825**                                  | -0.692*                               | 0.308  | 0.427   | 0.329  | 0.364    | 0.112  | 0.531   | 0.035  | -0.434  |
| MDOC                                    | 0.783**                 | 0.748**                              | 0.727**                          | 0.706*                            | -0.650*                                   | -0.706*                               | 0.21   | 0.664*  | 0.161  | 0.315    | 0.245  | 0.441   | 0.063  | -0.497  |
| TK                                      | 0.860***                | 0.846**                              | 0.846**                          | 0.860***                          | -0.685*                                   | -0.769**                              | 0.42   | 0.594*  | 0.357  | 0.503    | 0.238  | 0.615*  | -0.056 | -0.448  |
| FK                                      | 0.818**                 | 0.853***                             | 0.825**                          | 0.825**                           | -0.741**                                  | -0.790**                              | 0.378  | 0.552   | 0.357  | 0.413    | -0.021 | 0.685*  | -0.196 | -0.671* |
| MK                                      | 0.713**                 | 0.713**                              | 0.720**                          | 0.713**                           | -0.699*                                   | -0.727**                              | 0.42   | 0.336   | 0.622* | 0.322    | -0.154 | 0.797** | -0.448 | -0.503  |
| Fe in brown rice                        | 0.168                   | 0.51                                 | 0.559                            | 0.371                             | -0.392                                    | -0.720**                              | -0.224 | 0.378   | -0.343 | -0.112   | -0.077 | -0.231  | 0.028  | -0.483  |
| Mn in brown rice                        | 0.573                   | 0.741**                              | 0.762**                          | 0.783**                           | -0.406                                    | -0.713**                              | -0.049 | 0.364   | -0.112 | 0.147    | 0.07   | 0.119   | 0.147  | -0.462  |
| Cu in brown rice                        | 0.657*                  | 0.706*                               | 0.741**                          | 0.566                             | -0.748**                                  | -0.727**                              | 0.517  | 0.762** | 0.371  | 0.503    | 0.231  | 0.643*  | -0.063 | -0.462  |
| Zn in brown rice                        | 0.839**                 | 0.909***                             | 0.888***                         | 0.860***                          | -0.692*                                   | -0.748**                              | 0.573  | 0.734** | 0.273  | 0.657*   | 0.385  | 0.42    | 0.14   | -0.35   |
| K in brown rice                         | 0.685*                  | 0.741**                              | 0.762**                          | 0.734**                           | -0.517                                    | -0.720**                              | 0.189  | 0.706*  | 0.077  | 0.357    | 0.154  | 0.42    | 0.049  | -0.608* |
| TF <sub>root-stem</sub>                 | 1                       | 0.860***                             | 0.776**                          | 0.923***                          | -0.650*                                   | -0.552                                | 0.552  | 0.51    | 0.469  | 0.608*   | 0.28   | 0.685*  | 0.112  | -0.336  |
| TF <sub>stem-ordinary leaf</sub>        |                         | 1                                    | 0.972***                         | 0.916***                          | -0.853***                                 | -0.846**                              | 0.462  | .594*   | 0.343  | 0.545    | 0.14   | 0.524   | 0.154  | -0.517  |
| TF <sub>stem-flag leaf</sub>            |                         |                                      | 1                                | 0.881***                          | -0.825**                                  | -0.909***                             | 0.441  | .629*   | 0.357  | 0.531    | 0.154  | 0.483   | 0.119  | -0.476  |
| TF <sub>stem-brown rice</sub>           |                         |                                      |                                  | 1                                 | -0.615*                                   | -0.678*                               | 0.434  | 0.434   | 0.413  | 0.531    | 0.161  | 0.587*  | 0.084  | -0.385  |
| TF <sub>ordinary leaf- brown rice</sub> |                         |                                      |                                  |                                   | 1                                         | 0.839**                               | -0.476 | -0.594* | -0.392 | -0.49    | 0.014  | -0.517  | -0.07  | 0.573   |
| TF <sub>flag leaf-brown rice</sub>      |                         |                                      |                                  |                                   |                                           | 1                                     | -0.294 | -0.615* | -0.266 | -0.357   | 0.035  | -0.364  | 0.077  | 0.580*  |
| TPn                                     |                         |                                      |                                  |                                   |                                           |                                       | 1      | 0.524   | 0.615* | 0.902*** | 0.357  | 0.671*  | -0.077 | 0.021   |
| FPn                                     |                         |                                      |                                  |                                   |                                           |                                       |        | 1       | 0.217  | 0.678*   | 0.336  | 0.343   | 0.238  | -0.42   |
| MPn                                     |                         |                                      |                                  |                                   |                                           |                                       |        |         | 1      | 0.517    | -0.182 | 0.769** | -0.378 | -0.14   |

Continued Table S7.

|                         | TF <sub>root-stem</sub> | TF <sub>stem</sub><br>-ordinary leaf | TF <sub>stem</sub><br>-flag leaf | TF <sub>stem</sub><br>-brown rice | TF <sub>ordinary</sub><br>leaf-brown rice | TF <sub>flag</sub><br>leaf-brown rice | TPn       | FPn                             | MPn                             | TTr                             | FTr    | MTr    | TCi    | FCi             |
|-------------------------|-------------------------|--------------------------------------|----------------------------------|-----------------------------------|-------------------------------------------|---------------------------------------|-----------|---------------------------------|---------------------------------|---------------------------------|--------|--------|--------|-----------------|
| TTr                     |                         |                                      |                                  |                                   |                                           |                                       |           |                                 |                                 | 1                               | 0.399  | 0.587* | 0.217  | -0.091          |
| FTr                     |                         |                                      |                                  |                                   |                                           |                                       |           |                                 |                                 |                                 | 1      | -0.161 | 0.462  | 0.594*          |
| MTr                     |                         |                                      |                                  |                                   |                                           |                                       |           |                                 |                                 |                                 |        | 1      | -0.322 | -0.434          |
| TCi                     |                         |                                      |                                  |                                   |                                           |                                       |           |                                 |                                 |                                 |        |        | 1      | 0.14            |
| FCi                     |                         |                                      |                                  |                                   |                                           |                                       |           |                                 |                                 |                                 |        |        |        | 1               |
|                         | MCi                     | Tgs                                  | Fgs                              | Mgs                               | TSPAD                                     | FSPAD                                 | MSPAD     | TF <sub>v</sub> /F <sub>m</sub> | FF <sub>v</sub> /F <sub>m</sub> | MF <sub>v</sub> /F <sub>m</sub> | TSOD   | TPOD   | TCAT   | Soil<br>DTPA-Cd |
| Cd in brown rice        | -0.587*                 | -0.385                               | -0.056                           | -0.622*                           | -0.34                                     | -0.900***                             | -0.944*** | -0.413                          | -0.734**                        | -0.706*                         | -0.224 | -0.566 | -0.371 | 0.902***        |
| TpH                     | 0.636*                  | 0.804**                              | 0.14                             | 0.559                             | 0.680*                                    | 0.592*                                | 0.476     | 0.776**                         | 0.622*                          | 0.818**                         | 0.559  | 0.601* | 0.664* | -0.462          |
| FpH                     | 0.684*                  | 0.414                                | -0.081                           | 0.821***                          | 0.33                                      | 0.838**                               | 0.846**   | 0.354                           | 0.575                           | 0.537                           | 0.305  | 0.632* | 0.47   | -0.930***       |
| MpH                     | 0.646*                  | 0.625*                               | 0.277                            | 0.751**                           | 0.301                                     | 0.898**                               | 0.821**   | 0.54                            | 0.663*                          | 0.779**                         | 0.291  | 0.488  | 0.456  | -0.789**        |
| TDOC                    | 0.566                   | 0.189                                | 0.217                            | 0.455                             | 0.091                                     | 0.844**                               | 0.881***  | 0.224                           | 0.580*                          | 0.552                           | -0.091 | 0.524  | 0.175  | -0.881***       |
| FDOC                    | 0.448                   | 0.364                                | 0.07                             | 0.524                             | 0.322                                     | 0.792**                               | 0.818**   | 0.252                           | 0.573                           | 0.566                           | 0.007  | 0.615* | 0.406  | -0.846**        |
| MDOC                    | 0.497                   | 0.252                                | 0.133                            | 0.49                              | 0.238                                     | 0.876***                              | 0.888***  | 0.21                            | 0.664*                          | 0.713**                         | -0.049 | 0.517  | 0.224  | -0.818**        |
| TK                      | 0.636*                  | 0.434                                | 0.196                            | 0.643*                            | 0.291                                     | 0.949***                              | 0.965***  | 0.406                           | 0.706*                          | 0.664*                          | 0.154  | 0.657* | 0.406  | -0.972***       |
| FK                      | 0.706*                  | 0.329                                | -0.063                           | 0.720**                           | 0.368                                     | 0.914***                              | 0.944***  | 0.329                           | 0.685*                          | 0.685*                          | 0.189  | 0.650* | 0.406  | -0.958***       |
| MK                      | 0.469                   | 0.322                                | -0.126                           | 0.790**                           | 0.529                                     | 0.725**                               | 0.853***  | 0.259                           | 0.476                           | 0.559                           | 0.315  | 0.573  | 0.622* | -0.874***       |
| Fe in brown rice        | 0.21                    | -0.294                               | -0.217                           | -0.175                            | -0.053                                    | 0.368                                 | 0.441     | -0.049                          | 0.559                           | 0.182                           | -0.091 | 0.315  | -0.385 | -0.357          |
| Mn in brown rice        | 0.476                   | -0.021                               | -0.014                           | 0.182                             | -0.074                                    | 0.690*                                | 0.727**   | 0.133                           | 0.594*                          | 0.266                           | -0.021 | 0.378  | -0.105 | -0.699*         |
| Cu in brown rice        | 0.531                   | 0.517                                | 0.217                            | 0.692*                            | 0.256                                     | 0.834**                               | 0.783**   | 0.406                           | 0.601*                          | 0.741**                         | 0.14   | 0.497  | 0.364  | -0.776**        |
| Zn in brown rice        | 0.790**                 | 0.559                                | 0.315                            | 0.476                             | 0.322                                     | 0.879***                              | 0.818**   | 0.685*                          | 0.734**                         | 0.769**                         | 0.315  | 0.566  | 0.364  | -0.776**        |
| K in brown rice         | 0.608*                  | 0.238                                | 0.07                             | 0.503                             | 0.067                                     | 0.876***                              | 0.839**   | 0.266                           | 0.741**                         | 0.608*                          | 0.042  | 0.497  | 0.063  | -0.804**        |
| TF <sub>root-stem</sub> | 0.762**                 | 0.580*                               | 0.252                            | 0.713**                           | 0.417                                     | 0.893***                              | 0.860***  | 0.552                           | 0.503                           | 0.748**                         | 0.266  | 0.476  | 0.622* | -0.846**        |

Continued Table S7.

|                                         | MCi     | Tgs      | Fgs      | Mgs      | TSPAD   | FSPAD    | MSPAD    | TF <sub>v</sub> /F <sub>m</sub> | FF <sub>v</sub> /F <sub>m</sub> | MF <sub>v</sub> /F <sub>m</sub> | TSOD    | TPOD    | TCAT     | Soil<br>DTPA-Cd |
|-----------------------------------------|---------|----------|----------|----------|---------|----------|----------|---------------------------------|---------------------------------|---------------------------------|---------|---------|----------|-----------------|
| TF <sub>stem-ordinary leaf</sub>        | 0.776** | 0.483    | 0.098    | 0.580*   | 0.333   | 0.914*** | 0.895*** | 0.566                           | 0.685*                          | 0.699*                          | 0.28    | 0.524   | 0.42     | -0.874***       |
| TF <sub>stem-flag leaf</sub>            | 0.685*  | 0.476    | 0.126    | 0.545    | 0.28    | 0.890*** | 0.888*** | 0.566                           | 0.727**                         | 0.643*                          | 0.308   | 0.517   | 0.364    | -0.860***       |
| TF <sub>stem-brown rice</sub>           | 0.741** | 0.462    | 0.147    | 0.629*   | 0.315   | 0.872*** | 0.881*** | 0.524                           | 0.566                           | 0.587*                          | 0.315   | 0.469   | 0.497    | -0.874***       |
| TF <sub>ordinary leaf- brown rice</sub> | -0.636* | -0.476   | 0.056    | -0.538   | -0.48   | -0.764** | -0.748** | -0.497                          | -0.650*                         | -0.706*                         | -0.287  | -0.587* | -0.455   | 0.741**         |
| TF <sub>flag leaf-brown rice</sub>      | -0.51   | -0.266   | 0.091    | -0.399   | -0.333  | -0.753** | -0.811** | -0.378                          | -0.783**                        | -0.545                          | -0.28   | -0.636* | -0.217   | 0.783**         |
| TPn                                     | 0.664*  | 0.909*** | 0.441    | 0.622*   | 0.504   | 0.48     | 0.329    | 0.846**                         | 0.301                           | 0.566                           | 0.636*  | 0.538   | 0.720**  | -0.434          |
| FPn                                     | 0.622*  | 0.615*   | 0.252    | 0.413    | 0.284   | 0.711**  | 0.545    | 0.643*                          | 0.783**                         | 0.790**                         | 0.343   | 0.517   | 0.196    | -0.483          |
| MPn                                     | 0.343   | 0.629*   | -0.084   | 0.755**  | 0.795** | 0.326    | 0.406    | 0.587*                          | 0.273                           | 0.51                            | 0.783** | 0.322   | 0.937*** | -0.385          |
| TTr                                     | 0.776** | 0.958*** | 0.441    | 0.566    | 0.417   | 0.613*   | 0.399    | 0.923***                        | 0.517                           | 0.594*                          | 0.643*  | 0.608*  | 0.601*   | -0.49           |
| FTr                                     | 0.07    | 0.42     | 0.972*** | -0.154   | -0.315  | 0.266    | 0.119    | 0.35                            | 0.056                           | 0.196                           | -0.259  | 0.021   | -0.056   | -0.112          |
| MTr                                     | 0.636*  | 0.622*   | -0.063   | 0.979*** | 0.574   | 0.609*   | 0.580*   | 0.462                           | 0.273                           | 0.559                           | 0.538   | 0.469   | 0.811**  | -0.671*         |
| TCi                                     | 0.154   | 0.224    | 0.406    | -0.259   | -0.438  | 0.165    | -0.07    | 0.196                           | 0.042                           | 0.021                           | -0.259  | -0.245  | -0.287   | 0.098           |
| FCi                                     | -0.559  | 0.014    | 0.664*   | -0.497   | -0.333  | -0.518   | -0.517   | -0.056                          | -0.580*                         | -0.462                          | -0.217  | -0.413  | -0.098   | 0.503           |
| MCi                                     | 1       | 0.664*   | 0.056    | 0.664*   | 0.392   | 0.781**  | 0.608*   | 0.720**                         | 0.601*                          | 0.685*                          | 0.483   | 0.594*  | 0.476    | -0.678*         |
| Tgs                                     |         | 1        | 0.49     | 0.615*   | 0.424   | 0.553    | 0.357    | 0.916***                        | 0.399                           | 0.608*                          | 0.622*  | 0.441   | 0.692*   | -0.42           |
| Fgs                                     |         |          | 1        | -0.07    | -0.329  | 0.217    | 0.063    | 0.378                           | -0.056                          | 0.112                           | -0.189  | -0.021  | 0.028    | -0.098          |
| Mgs                                     |         |          |          | 1        | 0.529   | 0.669*   | 0.636*   | 0.483                           | 0.336                           | 0.636*                          | 0.51    | 0.385   | 0.769**  | -0.685*         |
| TSPAD                                   |         |          |          |          | 1       | 0.26     | 0.361    | 0.494                           | 0.413                           | 0.602*                          | 0.764** | 0.539   | 0.813**  | -0.305          |
| FSPAD                                   |         |          |          |          |         | 1        | 0.932*** | 0.539                           | 0.739**                         | 0.764**                         | 0.186   | 0.585*  | 0.396    | -0.928***       |
| MSPAD                                   |         |          |          |          |         |          | 1        | 0.385                           | 0.720**                         | 0.713**                         | 0.168   | 0.559   | 0.434    | -0.951***       |
| TF <sub>v</sub> /F <sub>m</sub>         |         |          |          |          |         |          |          | 1                               | 0.559                           | 0.650*                          | 0.727** | 0.469   | 0.622*   | -0.392          |
| FF <sub>v</sub> /F <sub>m</sub>         |         |          |          |          |         |          |          |                                 | 1                               | 0.692*                          | 0.399   | 0.713** | 0.203    | -0.650*         |
| MF <sub>v</sub> /F <sub>m</sub>         |         |          |          |          |         |          |          |                                 |                                 | 1                               | 0.385   | 0.448   | 0.566    | -0.594*         |

Continued Table S7.

|              | MCi | Tgs | Fgs | Mgs | TSPAD | FSPAD | MSPAD | TF <sub>v</sub> /F <sub>m</sub> | FF <sub>v</sub> /F <sub>m</sub> | MF <sub>v</sub> /F <sub>m</sub> | TSOD | TPOD  | TCAT   | Soil<br>DTPA-Cd |
|--------------|-----|-----|-----|-----|-------|-------|-------|---------------------------------|---------------------------------|---------------------------------|------|-------|--------|-----------------|
| TSOD         |     |     |     |     |       |       |       |                                 |                                 |                                 | 1    | 0.455 | 0.706* | -0.182          |
| TPOD         |     |     |     |     |       |       |       |                                 |                                 |                                 |      | 1     | 0.385  | -0.671*         |
| TCAT         |     |     |     |     |       |       |       |                                 |                                 |                                 |      |       | 1      | -0.448          |
| Soil DTPA Cd |     |     |     |     |       |       |       |                                 |                                 |                                 |      |       |        | 1               |

H-Cd, highly contaminated soil (4 mg kg<sup>-1</sup>); T, Tillering stage; F, Filling stage; M, Maturity stage; pH value, DOC and K concentrations of soil solution; TF, transfer factors (TF) of Cd between different rice organs; Pn, net photosynthetic rate; Tr, transpiration rate; Ci, substomatal CO<sub>2</sub> concentration; gs, stomatal conductance; SPAD, soil and plant analysis development; F<sub>v</sub>/F<sub>m</sub>, chlorophyll fluorescence parameter; SOD, superoxide dismutase; POD, peroxidase, CAT, catalase; \**p*<0.05, \*\**p*<0.01, \*\*\**p*<0.001.

**Table S8** Spearman correlation among soil solution chemistry, minerals in brown rice, photosynthetic and chlorophyll fluorescence characteristics, enzyme activity of leaves, soil DTPA-Cd and Cd in brown rice using all the data.

|                  | TpH                     | FpH                                  | MpH                              | TDOC                              | FDOC                                      | MDOC                                  | TK       | FK        | MK        | Fe in<br>brown<br>rice | Mn in<br>brown<br>rice | Cu in<br>brown<br>rice | Zn in<br>brown<br>rice | K in<br>brown<br>rice |
|------------------|-------------------------|--------------------------------------|----------------------------------|-----------------------------------|-------------------------------------------|---------------------------------------|----------|-----------|-----------|------------------------|------------------------|------------------------|------------------------|-----------------------|
| Cd in brown rice | -0.079                  | -0.281                               | -0.432**                         | -0.666***                         | -0.133                                    | -0.333*                               | -0.425** | -0.739*** | -0.636*** | -0.580***              | -0.743***              | -0.878***              | -0.880***              | -0.740***             |
| TpH              | 1                       | 0.235                                | 0.354*                           | 0.188                             | 0.550**                                   | 0.487**                               | 0.527**  | 0.436**   | 0.227     | -0.011                 | -0.001                 | 0.188                  | 0.177                  | 0.319                 |
| FpH              |                         | 1                                    | 0.443**                          | 0.639***                          | 0.316                                     | 0.192                                 | 0.547**  | 0.534**   | 0.530**   | 0.121                  | 0.024                  | 0.126                  | 0.425**                | 0.446**               |
| MpH              |                         |                                      | 1                                | 0.488**                           | 0.616***                                  | 0.715***                              | 0.748*** | 0.659***  | 0.561***  | 0.151                  | 0.306                  | 0.470**                | 0.571***               | 0.699***              |
| TDOC             |                         |                                      |                                  | 1                                 | 0.256                                     | 0.392*                                | 0.684*** | 0.749***  | 0.544**   | 0.451**                | 0.451**                | 0.579***               | 0.745***               | 0.835***              |
| FDOC             |                         |                                      |                                  |                                   | 1                                         | 0.712***                              | 0.719*** | 0.567***  | 0.455**   | 0.067                  | 0.172                  | 0.152                  | 0.318                  | 0.468**               |
| MDOC             |                         |                                      |                                  |                                   |                                           | 1                                     | 0.812*** | 0.637***  | 0.476**   | 0.143                  | 0.327                  | 0.445**                | 0.505**                | 0.651***              |
| TK               |                         |                                      |                                  |                                   |                                           |                                       | 1        | 0.847***  | 0.638***  | 0.19                   | 0.338*                 | 0.474**                | 0.586***               | 0.803***              |
| FK               |                         |                                      |                                  |                                   |                                           |                                       |          | 1         | 0.731***  | 0.425**                | 0.601***               | 0.729***               | 0.791***               | 0.850***              |
| MK               |                         |                                      |                                  |                                   |                                           |                                       |          |           | 1         | 0.378*                 | 0.444**                | 0.458**                | 0.743***               | 0.618***              |
| Fe in brown rice |                         |                                      |                                  |                                   |                                           |                                       |          |           |           | 1                      | 0.763***               | 0.582***               | 0.590***               | 0.501**               |
| Mn in brown rice |                         |                                      |                                  |                                   |                                           |                                       |          |           |           |                        | 1                      | 0.740***               | 0.700***               | 0.667***              |
| Cu in brown rice |                         |                                      |                                  |                                   |                                           |                                       |          |           |           |                        |                        | 1                      | 0.785***               | 0.753***              |
| Zn in brown rice |                         |                                      |                                  |                                   |                                           |                                       |          |           |           |                        |                        |                        | 1                      | 0.785***              |
| K in brown rice  |                         |                                      |                                  |                                   |                                           |                                       |          |           |           |                        |                        |                        |                        | 1                     |
|                  | TF <sub>root-stem</sub> | TF <sub>stem</sub><br>-ordinary leaf | TF <sub>stem</sub><br>-flag leaf | TF <sub>stem</sub><br>-brown rice | TF <sub>ordinary</sub><br>leaf-brown rice | TF <sub>flag</sub><br>leaf-brown rice | TPn      | FPn       | MPn       | TTr                    | FTr                    | MTr                    | TCi                    | FCi                   |
| Cd in brown rice | -0.529**                | 0.674***                             | 0.614***                         | 0.540**                           | -0.347*                                   | -0.354*                               | -0.283   | -0.125    | -0.223    | -0.297                 | -0.228                 | -0.288                 | -0.09                  | -0.023                |
| TpH              | 0.235                   | 0.051                                | 0.141                            | 0.071                             | -0.027                                    | -0.209                                | 0.362*   | 0.321     | 0.531**   | 0.086                  | 0.075                  | 0.266                  | -0.377*                | -0.11                 |
| FpH              | 0.474**                 | -0.203                               | -0.14                            | -0.321                            | -0.281                                    | -0.397*                               | 0.301    | 0.534**   | 0.482**   | 0.223                  | 0.372*                 | 0.523**                | -0.217                 | -0.121                |

Continued Table S8.

|                                         | TF <sub>root-stem</sub> | TF <sub>stem</sub><br>-ordinary leaf | TF <sub>stem</sub><br>-flag leaf | TF <sub>stem</sub><br>-brown rice | TF <sub>ordinary</sub><br>leaf-brown rice | TF <sub>flag</sub><br>leaf-brown rice | TPn     | FPn     | MPn      | TTr      | FTr      | MTr      | TCi     | FCi    |
|-----------------------------------------|-------------------------|--------------------------------------|----------------------------------|-----------------------------------|-------------------------------------------|---------------------------------------|---------|---------|----------|----------|----------|----------|---------|--------|
| MpH                                     | 0.586***                | -0.023                               | -0.028                           | 0.068                             | 0.096                                     | 0.065                                 | 0.11    | 0.348*  | 0.624*** | 0.08     | 0.281    | 0.217    | -0.129  | -0.025 |
| TDOC                                    | 0.680***                | -0.551***                            | -0.482**                         | -0.541**                          | 0.146                                     | 0.016                                 | 0.359*  | 0.427** | 0.32     | 0.367*   | 0.343*   | 0.193    | -0.019  | -0.05  |
| FDOC                                    | 0.345*                  | 0.115                                | 0.299                            | 0.134                             | -0.117                                    | -0.370*                               | 0.012   | 0.299   | 0.511**  | -0.156   | 0.109    | 0.149    | -0.351* | -0.15  |
| MDOC                                    | 0.540**                 | 0.111                                | 0.194                            | 0.271                             | 0.108                                     | -0.071                                | 0.081   | 0.325   | 0.460**  | 0.067    | 0.188    | 0.081    | -0.109  | -0.125 |
| TK                                      | 0.658***                | -0.141                               | 0.029                            | -0.034                            | 0.086                                     | -0.198                                | 0.232   | 0.378*  | 0.627*** | 0.154    | 0.27     | 0.271    | -0.192  | -0.083 |
| FK                                      | 0.582***                | -0.465**                             | -0.31                            | -0.338*                           | 0.227                                     | -0.005                                | 0.271   | 0.308   | 0.492**  | 0.239    | 0.236    | 0.328    | -0.099  | -0.106 |
| MK                                      | 0.706***                | -0.185                               | -0.102                           | -0.19                             | -0.198                                    | -0.119                                | 0.362*  | 0.179   | 0.557*** | 0.309    | 0.261    | 0.546**  | -0.055  | 0.067  |
| Fe in brown rice                        | 0.146                   | -0.499**                             | -0.500**                         | -0.406*                           | 0.262                                     | 0.237                                 | 0.16    | 0.191   | 0.083    | 0.158    | 0.018    | -0.012   | 0.07    | -0.105 |
| Mn in brown rice                        | 0.303                   | -0.489**                             | -0.410*                          | -0.283                            | 0.384*                                    | 0.346*                                | 0.221   | -0.014  | 0.133    | 0.28     | 0.002    | 0.044    | 0.146   | -0.083 |
| Cu in brown rice                        | 0.424**                 | -0.610***                            | -0.564***                        | -0.391*                           | 0.527**                                   | 0.465**                               | 0.307   | 0.125   | 0.26     | 0.328    | 0.158    | 0.183    | 0.132   | -0.006 |
| Zn in brown rice                        | 0.667***                | -0.539**                             | -0.463**                         | -0.439**                          | 0.226                                     | 0.182                                 | 0.431** | 0.373*  | 0.333*   | 0.446**  | 0.454**  | 0.264    | 0.093   | 0.094  |
| K in brown rice                         | 0.708***                | -0.406*                              | -0.305                           | -0.283                            | 0.248                                     | 0.115                                 | 0.31    | 0.329   | 0.454**  | 0.268    | 0.197    | 0.213    | -0.066  | -0.155 |
| TF <sub>root-stem</sub>                 | 1                       | -0.129                               | -0.147                           | -0.153                            | -0.18                                     | 0.01                                  | 0.440** | 0.221   | 0.519**  | 0.428**  | 0.333*   | 0.444**  | 0.051   | 0.092  |
| TF <sub>stem-ordinary leaf</sub>        |                         | 1                                    | 0.877***                         | 0.893***                          | -0.528**                                  | -0.345*                               | -0.215  | -0.156  | 0.053    | -0.314   | -0.218   | -0.085   | -0.227  | -0.059 |
| TF <sub>stem-flag leaf</sub>            |                         |                                      | 1                                | 0.814***                          | -0.463**                                  | -0.583***                             | -0.145  | -0.113  | 0.107    | -0.274   | -0.21    | -0.02    | -0.282  | -0.148 |
| TF <sub>stem-brown rice</sub>           |                         |                                      |                                  | 1                                 | -0.15                                     | -0.09                                 | -0.247  | -0.275  | 0.019    | -0.313   | -0.291   | -0.227   | -0.119  | -0.073 |
| TF <sub>ordinary leaf- brown rice</sub> |                         |                                      |                                  |                                   | 1                                         | 0.697***                              | -0.108  | -0.17   | -0.222   | -0.036   | -0.106   | -0.486** | 0.24    | 0.005  |
| TF <sub>flag leaf-brown rice</sub>      |                         |                                      |                                  |                                   |                                           | 1                                     | -0.02   | -0.403* | -0.225   | 0.063    | -0.152   | -.377*   | 0.358*  | 0.187  |
| TPn                                     |                         |                                      |                                  |                                   |                                           |                                       | 1       | 0.171   | 0.340*   | 0.806*** | 0.233    | 0.357*   | -0.06   | 0.081  |
| FPn                                     |                         |                                      |                                  |                                   |                                           |                                       |         | 1       | 0.262    | 0.172    | 0.657*** | 0.292    | -0.178  | -0.042 |
| MPn                                     |                         |                                      |                                  |                                   |                                           |                                       |         |         | 1        | 0.184    | 0.162    | 0.590*** | -0.385* | -0.013 |



Continued Table S8.

|                         | TF <sub>root-stem</sub> | TF <sub>stem</sub><br>-ordinary leaf | TF <sub>stem</sub><br>-flag leaf | TF <sub>stem</sub><br>-brown rice | TF <sub>ordinary</sub><br>leaf-brown rice | TF <sub>flag</sub><br>leaf-brown rice | TPn       | Fpn                             | MPn                             | TTr                             | FTr       | MTr      | TCi     | FCi             |
|-------------------------|-------------------------|--------------------------------------|----------------------------------|-----------------------------------|-------------------------------------------|---------------------------------------|-----------|---------------------------------|---------------------------------|---------------------------------|-----------|----------|---------|-----------------|
| TTr                     |                         |                                      |                                  |                                   |                                           |                                       |           |                                 |                                 | 1                               | 0.323     | 0.3      | 0.434** | 0.148           |
| FTr                     |                         |                                      |                                  |                                   |                                           |                                       |           |                                 |                                 |                                 | 1         | 0.284    | 0.046   | 0.664***        |
| MTr                     |                         |                                      |                                  |                                   |                                           |                                       |           |                                 |                                 |                                 |           | 1        | -0.174  | 0.018           |
| TCi                     |                         |                                      |                                  |                                   |                                           |                                       |           |                                 |                                 |                                 |           |          | 1       | 0.127           |
| FCi                     |                         |                                      |                                  |                                   |                                           |                                       |           |                                 |                                 |                                 |           |          |         | 1               |
|                         | MCi                     | Tgs                                  | Fgs                              | Mgs                               | TSPAD                                     | FSPAD                                 | MSPAD     | TF <sub>v</sub> /F <sub>m</sub> | FF <sub>v</sub> /F <sub>m</sub> | MF <sub>v</sub> /F <sub>m</sub> | TSOD      | TPOD     | TCAT    | Soil<br>DTPA-Cd |
| Cd in brown rice        | -0.175                  | -0.354*                              | -0.249                           | -0.278                            | -0.681***                                 | -0.440**                              | -0.846*** | -0.591***                       | -0.380*                         | 0.013                           | -0.578*** | -0.412*  | -0.155  | 0.827***        |
| TpH                     | -0.001                  | 0.055                                | 0.073                            | 0.27                              | 0.121                                     | 0.384*                                | 0.17      | 0.453**                         | 0.499**                         | 0.555***                        | 0.023     | 0.503**  | 0.325   | -0.07           |
| FpH                     | 0.325                   | 0.238                                | 0.348*                           | 0.528**                           | 0.285                                     | 0.672***                              | 0.478**   | 0.365*                          | 0.666***                        | -0.025                          | 0.084     | 0.544**  | 0.352*  | -0.198          |
| MpH                     | -0.06                   | 0.05                                 | 0.287                            | 0.239                             | 0.279                                     | 0.492**                               | 0.541**   | 0.360*                          | 0.488**                         | 0.431**                         | 0.156     | 0.427**  | 0.188   | -0.560***       |
| TDOC                    | 0.084                   | 0.374*                               | 0.338*                           | 0.196                             | 0.352*                                    | 0.820***                              | 0.782***  | 0.658***                        | 0.780***                        | 0.001                           | 0.245     | 0.539**  | 0.234   | -0.453**        |
| FDOC                    | -0.119                  | -0.218                               | 0.078                            | 0.16                              | 0.128                                     | 0.449**                               | 0.381*    | 0.307                           | 0.327                           | 0.398*                          | -0.026    | 0.478**  | 0.267   | -0.337*         |
| MDOC                    | -0.093                  | 0.014                                | 0.172                            | 0.1                               | 0.222                                     | 0.481**                               | 0.535**   | 0.399*                          | 0.443**                         | 0.574***                        | 0.097     | 0.343*   | 0.001   | -0.528**        |
| TK                      | -0.024                  | 0.125                                | 0.261                            | 0.283                             | 0.19                                      | 0.749***                              | 0.658***  | 0.571***                        | 0.683***                        | 0.383*                          | 0.096     | 0.577*** | 0.22    | -0.457**        |
| FK                      | 0.118                   | 0.253                                | 0.236                            | 0.332*                            | 0.471**                                   | 0.707***                              | 0.790***  | 0.677***                        | 0.660***                        | 0.219                           | 0.354*    | 0.633*** | 0.306   | -0.663***       |
| MK                      | 0.207                   | 0.326                                | 0.256                            | 0.539**                           | 0.612***                                  | 0.447**                               | 0.745***  | 0.462**                         | 0.340*                          | 0.213                           | 0.28      | 0.475**  | 0.293   | -0.651***       |
| Fe in brown rice        | 0.003                   | 0.178                                | 0.046                            | -0.023                            | 0.348*                                    | 0.410*                                | 0.530**   | 0.447**                         | 0.386*                          | 0.013                           | 0.219     | 0.391*   | 0.359*  | -0.560***       |
| Mn in brown rice        | 0.112                   | 0.263                                | 0.019                            | 0.034                             | 0.385*                                    | 0.341*                                | 0.624***  | 0.502**                         | 0.253                           | 0.123                           | 0.419*    | 0.314    | 0.181   | -0.735***       |
| Cu in brown rice        | 0.025                   | 0.377*                               | 0.198                            | 0.183                             | 0.505**                                   | 0.479**                               | 0.776***  | 0.616***                        | 0.412*                          | 0.191                           | 0.520**   | 0.311    | 0.201   | -0.805***       |
| Zn in brown rice        | 0.174                   | 0.465**                              | 0.458**                          | 0.258                             | 0.666***                                  | 0.594***                              | 0.891***  | 0.722***                        | 0.519**                         | 0.107                           | 0.476**   | 0.519**  | 0.289   | -0.795***       |
| K in brown rice         | 0.068                   | 0.248                                | 0.2                              | 0.228                             | 0.328                                     | 0.754***                              | 0.844***  | 0.667***                        | 0.648***                        | 0.278                           | 0.27      | 0.510**  | 0.164   | -0.689***       |
| TF <sub>root-stem</sub> | 0.201                   | 0.397*                               | 0.329                            | 0.451**                           | 0.373*                                    | 0.595***                              | 0.704***  | 0.441**                         | 0.422*                          | 0.278                           | 0.155     | 0.244    | 0.094   | -0.508**        |

Continued Table S8.

|                                         | MCi      | Tgs      | Fgs      | Mgs      | TSPAD   | FSPAD    | MSPAD    | TF <sub>v</sub> /F <sub>m</sub> | FF <sub>v</sub> /F <sub>m</sub> | MF <sub>v</sub> /F <sub>m</sub> | TSOD     | TPOD     | TCAT    | Soil<br>DTPA-Cd |
|-----------------------------------------|----------|----------|----------|----------|---------|----------|----------|---------------------------------|---------------------------------|---------------------------------|----------|----------|---------|-----------------|
| TF <sub>stem-ordinary leaf</sub>        | -0.045   | -0.379*  | -0.253   | -0.063   | -0.344* | -0.374*  | -0.477** | -0.504**                        | -0.411*                         | 0.462**                         | -0.365*  | -0.308   | -0.273  | 0.309           |
| TF <sub>stem-flag leaf</sub>            | 0.032    | -0.331*  | -0.26    | 0.001    | -0.348* | -0.261   | -0.375*  | -0.318                          | -0.355*                         | 0.478**                         | -0.262   | -0.101   | -0.146  | 0.301           |
| TF <sub>stem-brown rice</sub>           | -0.146   | -0.364*  | -0.302   | -0.205   | -0.311  | -0.380*  | -0.384*  | -0.441**                        | -0.393*                         | 0.532**                         | -0.259   | -0.252   | -0.296  | 0.108           |
| TF <sub>ordinary leaf- brown rice</sub> | -0.419*  | 0.025    | -0.051   | -0.493** | 0.06    | -0.009   | 0.162    | 0.197                           | 0.129                           | -0.122                          | 0.217    | 0.095    | -0.039  | -0.266          |
| TF <sub>flag leaf-brown rice</sub>      | -0.386*  | 0.101    | -0.084   | -0.386*  | 0.156   | -0.245   | 0.101    | -0.068                          | -0.112                          | -0.15                           | 0.15     | -0.254   | -0.244  | -0.319          |
| TPn                                     | 0.198    | 0.788*** | 0.249    | 0.344*   | 0.213   | 0.371*   | 0.360*   | 0.546**                         | 0.330*                          | 0.233                           | 0.271    | 0.365*   | 0.425** | -0.133          |
| FPn                                     | 0.298    | 0.137    | 0.620*** | 0.303    | 0.154   | 0.634*** | 0.311    | 0.492**                         | 0.649***                        | 0.123                           | -0.023   | 0.410*   | 0.375*  | -0.089          |
| MPn                                     | -0.027   | 0.114    | 0.169    | 0.596*** | 0.338*  | 0.477**  | 0.407*   | 0.526**                         | 0.468**                         | 0.558***                        | 0.314    | 0.301    | 0.408*  | -0.27           |
| TTr                                     | 0.328    | 0.973*** | 0.340*   | 0.291    | 0.142   | 0.286    | 0.299    | 0.490**                         | 0.276                           | 0.078                           | 0.252    | 0.132    | 0.332*  | -0.121          |
| FTr                                     | 0.225    | 0.293    | 0.991*** | 0.275    | 0.186   | 0.330*   | 0.305    | 0.327                           | 0.336*                          | -0.106                          | 0.039    | 0.188    | 0.129   | -0.167          |
| MTr                                     | 0.630*** | 0.306    | 0.264    | 0.996*** | 0.358*  | 0.359*   | 0.353*   | 0.306                           | 0.179                           | 0.235                           | 0.29     | 0.185    | 0.429** | -0.265          |
| TCi                                     | 0.175    | 0.488**  | 0.064    | -0.168   | -0.134  | -0.169   | -0.03    | -0.11                           | -0.154                          | -0.289                          | -0.133   | -0.338*  | -0.099  | -0.037          |
| FCi                                     | -0.172   | 0.135    | 0.707*** | -0.005   | 0.022   | -0.227   | -0.025   | -0.101                          | -0.167                          | -0.187                          | -0.063   | -0.21    | -0.139  | -0.014          |
| MCi                                     | 1        | 0.339*   | 0.177    | 0.640*** | 0.09    | 0.217    | 0.138    | 0.134                           | 0.034                           | 0.011                           | 0.13     | 0.155    | 0.24    | -0.141          |
| Tgs                                     |          | 1        | 0.318    | 0.298    | 0.176   | 0.273    | 0.322    | 0.454**                         | 0.269                           | 0.032                           | 0.255    | 0.154    | 0.355*  | -0.15           |
| Fgs                                     |          |          | 1        | 0.254    | 0.19    | 0.315    | 0.307    | 0.32                            | 0.335*                          | -0.109                          | 0.048    | 0.177    | 0.137   | -0.19           |
| Mgs                                     |          |          |          | 1        | 0.334*  | 0.376*   | 0.358*   | 0.305                           | 0.187                           | 0.252                           | 0.276    | 0.169    | 0.422*  | -0.265          |
| TSPAD                                   |          |          |          |          | 1       | 0.183    | 0.638*** | 0.440**                         | 0.22                            | 0.118                           | 0.654*** | 0.293    | 0.248   | -0.634***       |
| FSPAD                                   |          |          |          |          |         | 1        | 0.672*** | 0.709***                        | 0.831***                        | 0.202                           | 0.186    | 0.602*** | 0.475** | -0.373*         |
| MSPAD                                   |          |          |          |          |         |          | 1        | 0.685***                        | 0.498**                         | 0.127                           | 0.453**  | 0.434**  | 0.271   | -0.816***       |
| TF <sub>v</sub> /F <sub>m</sub>         |          |          |          |          |         |          |          | 1                               | 0.653***                        | 0.24                            | 0.558*** | 0.535**  | 0.507** | -0.411*         |
| FF <sub>v</sub> /F <sub>m</sub>         |          |          |          |          |         |          |          |                                 | 1                               | 0.192                           | 0.094    | 0.614*** | 0.333*  | -0.188          |
| MF <sub>v</sub> /F <sub>m</sub>         |          |          |          |          |         |          |          |                                 |                                 | 1                               | 0.099    | 0.144    | 0.2     | -0.251          |

Continued Table S8.

|              | MCi | Tgs | Fgs | Mgs | TSPAD | FSPAD | MSPAD | TF <sub>v</sub> /F <sub>m</sub> | FF <sub>v</sub> /F <sub>m</sub> | MF <sub>v</sub> /F <sub>m</sub> | TSOD | TPOD  | TCAT    | Soil<br>DTPA-Cd |
|--------------|-----|-----|-----|-----|-------|-------|-------|---------------------------------|---------------------------------|---------------------------------|------|-------|---------|-----------------|
| TSOD         |     |     |     |     |       |       |       |                                 |                                 |                                 | 1    | 0.268 | 0.319   | -0.473**        |
| TPOD         |     |     |     |     |       |       |       |                                 |                                 |                                 |      | 1     | 0.530** | -0.326          |
| TCAT         |     |     |     |     |       |       |       |                                 |                                 |                                 |      |       | 1       | -0.165          |
| Soil DTPA Cd |     |     |     |     |       |       |       |                                 |                                 |                                 |      |       |         | 1               |

T, Tillering stage; F, Filling stage; M, Maturity stage; pH value, DOC and K concentrations of soil solution; TF, transfer factors (TF) of Cd between different rice organs; Pn, net photosynthetic rate; Tr, transpiration rate; Ci, substomatal CO<sub>2</sub> concentration; gs, stomatal conductance; SPAD, soil and plant analysis development; F<sub>v</sub>/F<sub>m</sub>, chlorophyll fluorescence parameter; SOD, superoxide dismutase; POD, peroxidase, CAT, catalase; \* $p < 0.05$ , \*\* $p < 0.01$ , \*\*\* $p < 0.001$ .

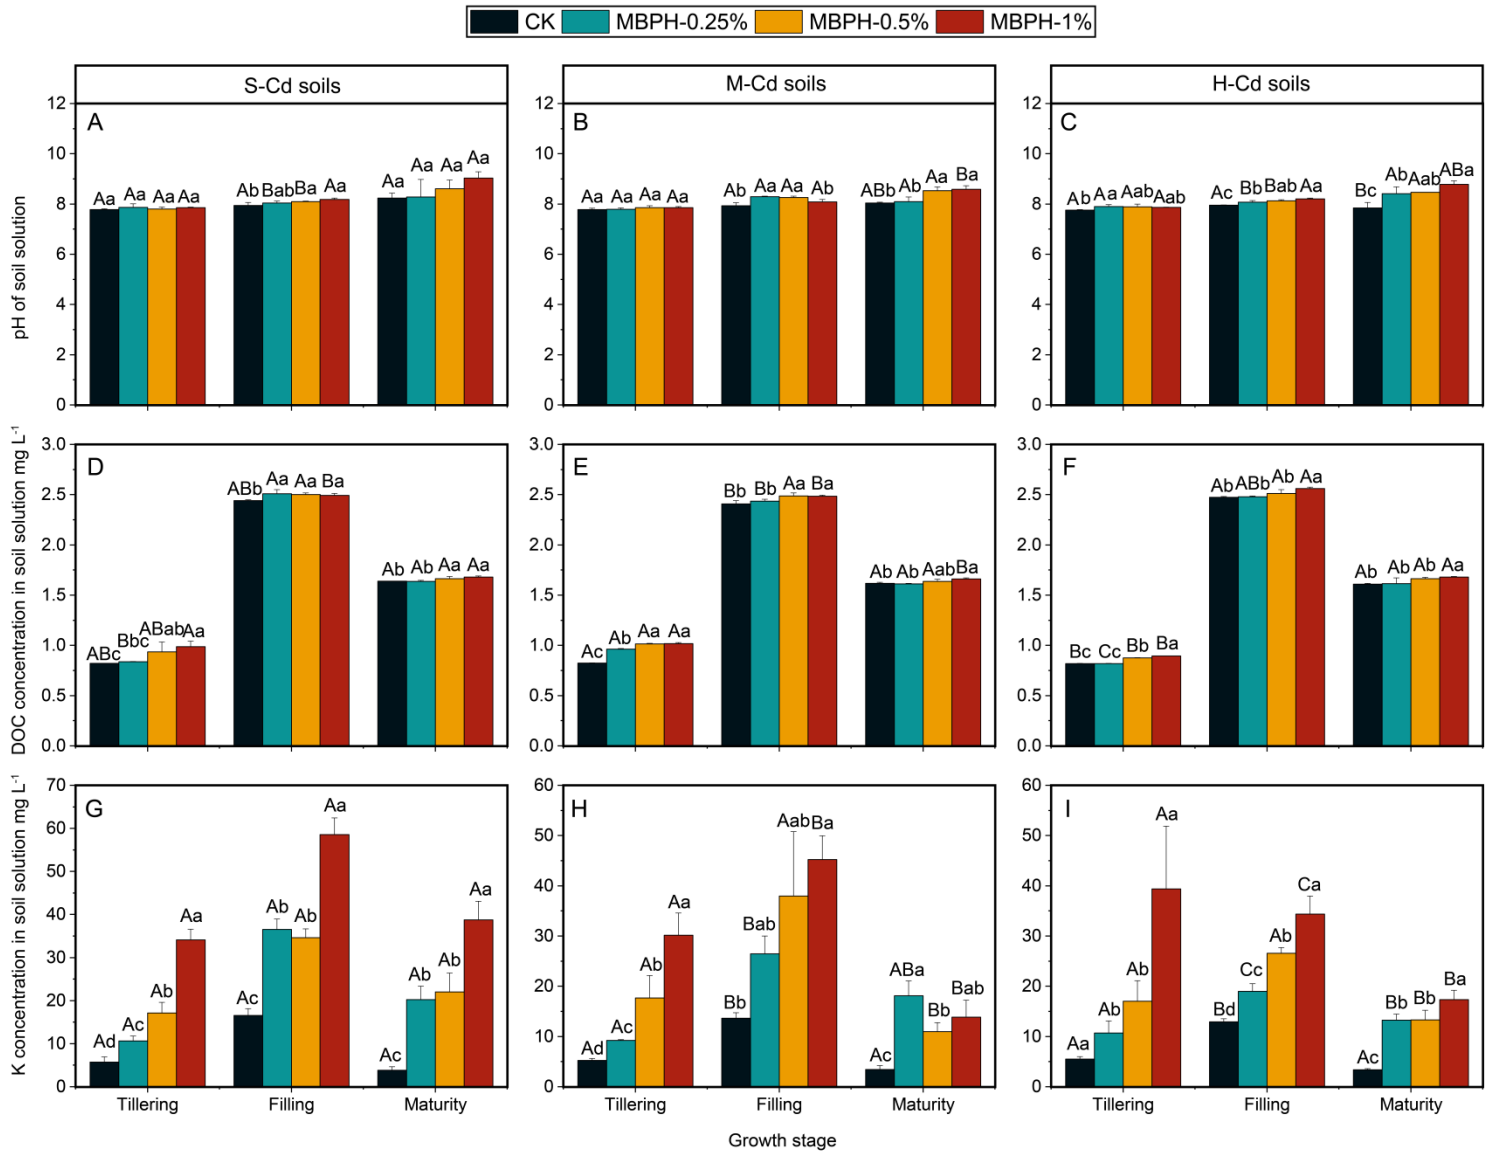

**Figure.S1.** Effects of application of mineral based potassium humate (MBPH) on pH (A-C), DOC (D-F), and K (G-I) in soil solution at different growth stages of rice under different soil contaminated levels. DOC, dissolved organic carbon; S-Cd, slightly contaminated soil (1 mg kg<sup>-1</sup>); M-Cd, moderately contaminated soil (2 mg kg<sup>-1</sup>); H-Cd, highly contaminated soil (4 mg kg<sup>-1</sup>). Lowercase letters indicate significant differences in different MBPH levels under the same Cd-contaminated soil; capital letters indicate significant differences among different Cd-contaminated soils at the same level of MBPH application ( $p < 0.05$ , Duncan test and Kruskal–Wallis test).

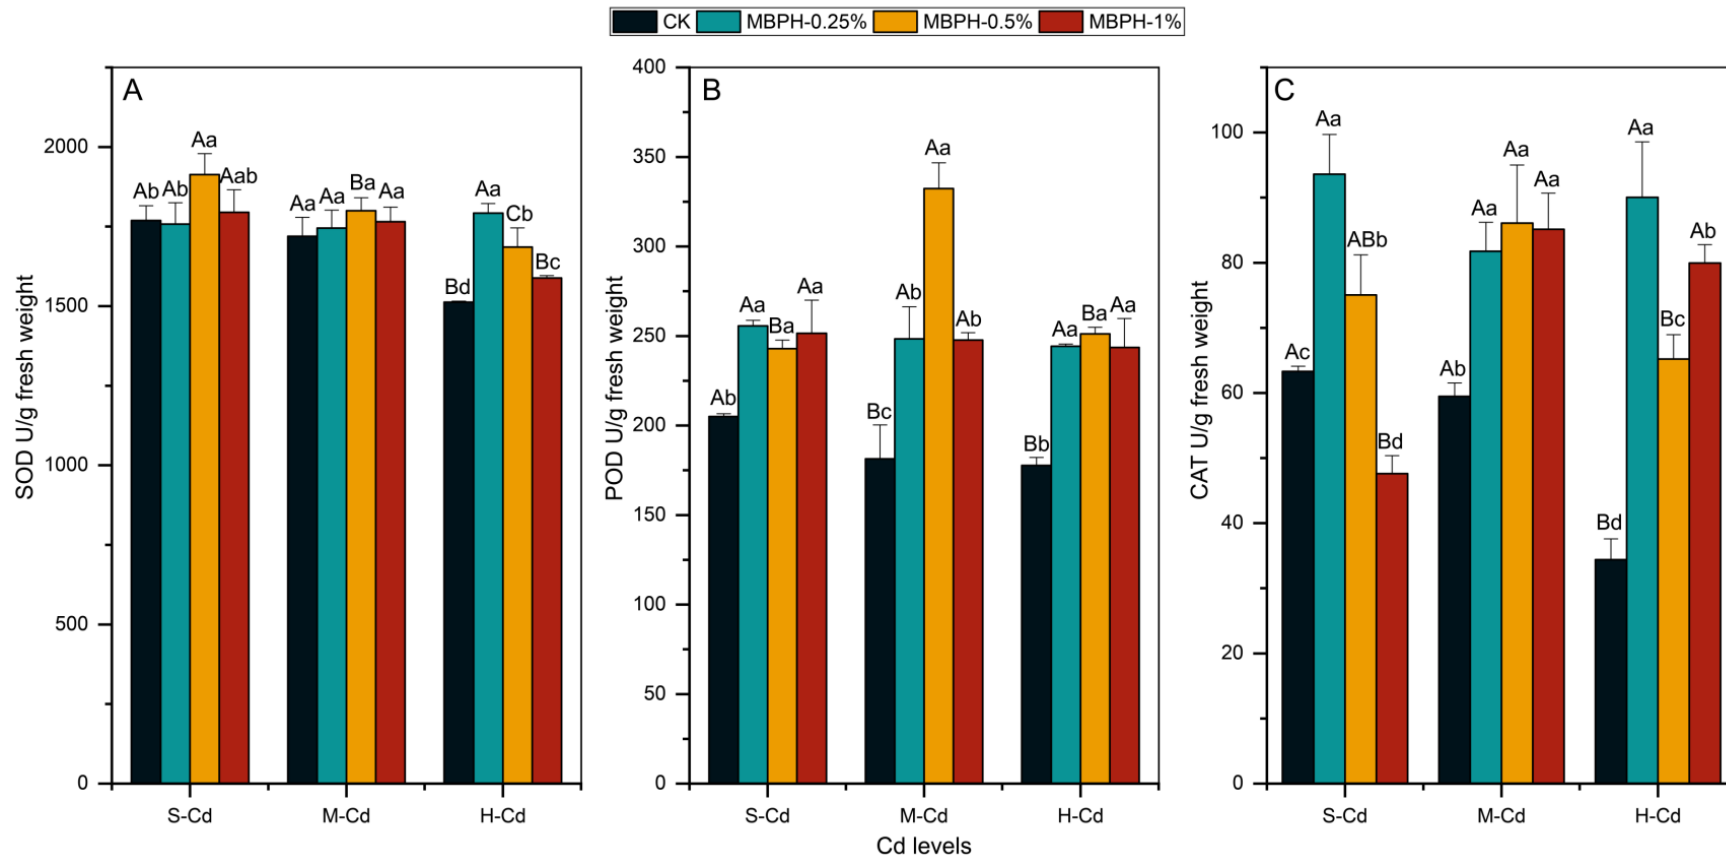

**Figure.S2.** Effects of application of mineral based potassium humate (MBPH) on the antioxidant enzyme activities of rice leaves at tillering stage under different soil contaminated levels. SOD (A), superoxide dismutase; POD (B), peroxidase, CAT (C), catalase; S-Cd, slightly contaminated soil ( $1 \text{ mg kg}^{-1}$ ); M-Cd, moderately contaminated soil ( $2 \text{ mg kg}^{-1}$ ); H-Cd, highly contaminated soil ( $4 \text{ mg kg}^{-1}$ ). Lowercase letters indicate significant differences in different MBPH levels under the same Cd-contaminated soil; capital letters indicate significant differences among different Cd-contaminated soils at the same level of MBPH application ( $p < 0.05$ , Duncan test and Kruskal–Wallis test).

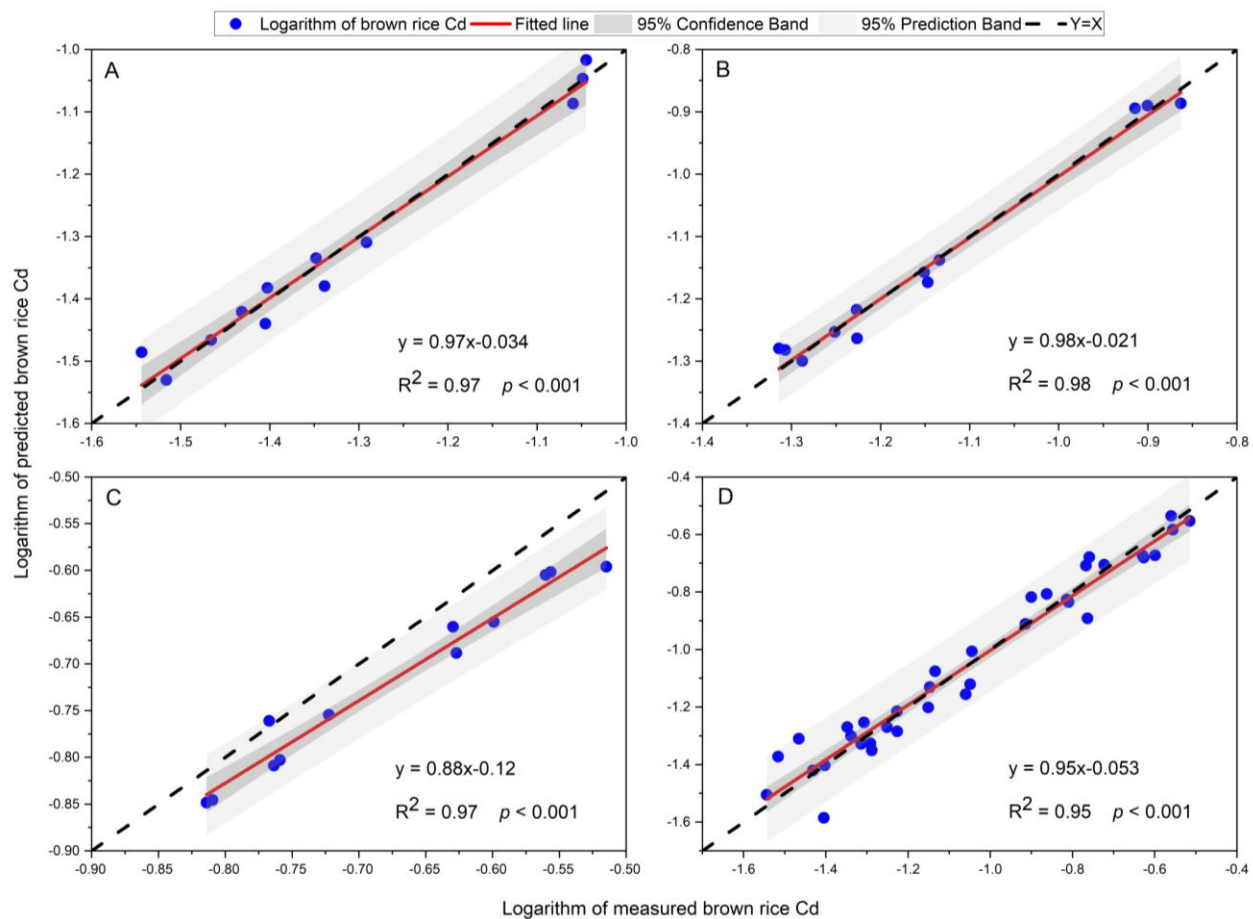

**Figure.S3.** Prediction equation validation in S-Cd (A), slightly contaminated soil (1 mg kg<sup>-1</sup>); M-Cd (B), moderately contaminated soil (2 mg kg<sup>-1</sup>); H-Cd (C), highly contaminated soil (4 mg kg<sup>-1</sup>); All the data (D).

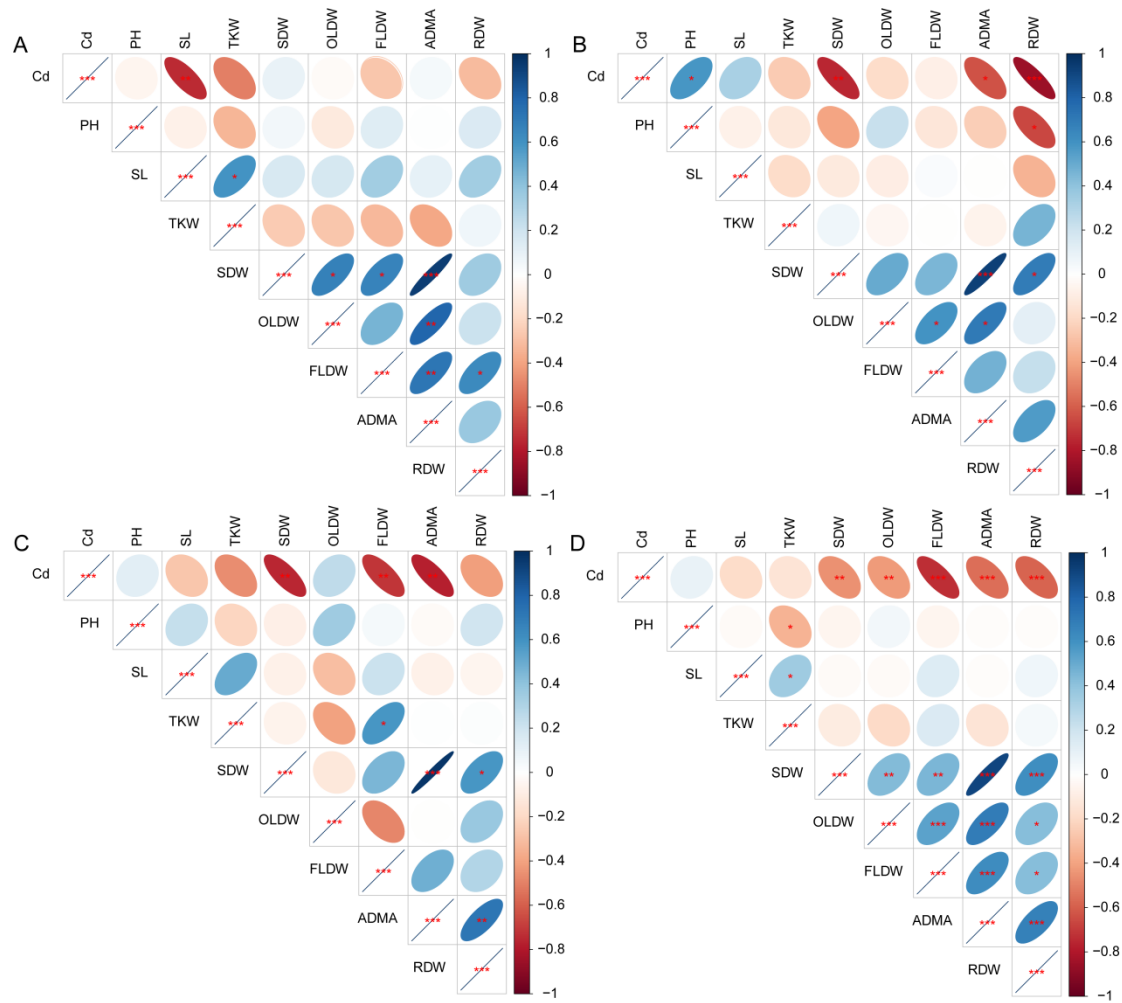

**Figure.S4.** Spearman correlation matrix for Cd concentration in brown rice and agronomic traits of rice. Diagonal shows the variable distribution diagram; the top right of the diagonal shows the Spearman correlation coefficient the level of significance ( $p < 0.05$  \*;  $p < 0.01$  \*\*;  $p < 0.001$  \*\*\*). S-Cd (A), slightly contaminated soil ( $1 \text{ mg kg}^{-1}$ ); M-Cd (B), moderately contaminated soil ( $2 \text{ mg kg}^{-1}$ ); H-Cd (C), highly contaminated soil ( $4 \text{ mg kg}^{-1}$ ); All the data (D). Cd, Cd concentration in brown rice; PH, Plant height; SL, spike length; TKW, thousand kernel weight; SDW, stem dry weight; OLDW, ordinary leaves dry weight; FLDW, flag leaves dry weight; ADMA, dry matter accumulation of aboveground; RDW, root dry weight.

## References:

90. Calderon, F.J.; Reeves, J.B.; Collins, H.P.; Paul, E.A. Chemical differences in soil organic matter fractions determined by diffuse-reflectance mid-infrared spectroscopy. *Soil Sci. Soc. Am J* **2011**, *75*, 568-579, <https://doi.org/10.2136/sssaj2009.0375>.
91. Zhao, J.; Huang, X.; Shi, Y.; Song, X.; Qin, Z.; Tang, J. FTIR characteristics of rhizosphere soil of multi-generation continuous Eucalyptus plantation in South Subtropical Region. *Ecol. Environ. Sci.* **2022**, *31*, 688-694 (in Chinese).
92. Ma, F.; Du, C.W.; Zhou, J.M.; Shen, Y.Z. Investigation of soil properties using different techniques of mid-infrared spectroscopy. *Eur. J. Soil Sci.* **2019**, *70*, 96-106, <https://doi.org/10.1111/ejss.12741>.
93. Cui, L.Q.; Pan, G.X.; Li, L.Q.; Bian, R.J.; Liu, X.Y.; Yan, J.L.; Quan, G.X.; Ding, C.; Chen, T.M.; Liu, Y.; et al. Continuous immobilization of cadmium and lead in biochar amended contaminated paddy soil: A five-year field experiment. *Ecol. Eng.* **2016**, *93*, 1-8, <https://doi.org/10.1016/j.ecoleng.2016.05.007>.
94. Janik, L.J.; Skjemstad, J.O.; Shepherd, K.D.; Spouncer, L.R. The prediction of soil carbon fractions using mid-infrared-partial least square analysis. *Aust. J. Soil Res.* **2007**, *45*, 73-81, <https://doi.org/10.1071/Sr06083>.
95. Hall, S.J.; Berhe, A.A.; Thompson, A. Order from disorder: do soil organic matter composition and turnover co-vary with iron phase crystallinity? *Biogeochemistry* **2018**, *140*, 93-110, <https://doi.org/10.1007/s10533-018-0476-4>.
96. Zhang M.Y.; Zhu Z.L.; Li H.H.; Feng C.L.; An, S.S. Comparison and application of different fourier transform infrared spectroscopy to soil spectral characteristics analysis. *Res. Soil Water Conserv.* **2022**, *29*, 121-128, <https://doi.org/10.13869/j.cnki.rswc.20220414.006> (in Chinese).
97. Srivastava, M.; Mishra, A.K. Comparative responses of diazotrophic abundance and community structure to the chemical composition of paddy soil. *Environ. Sci. Pollut. R.* **2018**, *25*, 399-412, <https://doi.org/10.1007/s11356-017-0375-6>.
98. Li T.; Zhao S.W.; Li X.X.; M S. Characters of soil organic matter functional groups in the fields planted with alfalfa (*Medicago sativa*) for different years in hilly regions of South Ningxia , Northwest China. *Chin. J. Appl. Environ. Biol.* **2012**, *23*, 3266-3272, <https://doi.org/10.13287/j.1001-9332.2012.0406> (in Chinese).
99. Li, Z.; Liu, S.; Liu, J.; Li, D.; Liu, F. Characteristics and influencing factors of soil organic carbon functional groups in coastal wetlands with different. *Chin. J. Appl. Ecol.* **2022**, *28*, 276-282, <https://doi.org/10.19675/j.cnki.1006-687x.2020.11047> (in Chinese).
100. Wu, W.X.; Yang, M.; Feng, Q.B.; McGrouther, K.; Wang, H.L.; Lu, H.H.; Chen, Y.X. Chemical characterization of rice straw-derived biochar for soil amendment. *Biomass Bioenerg.* **2012**, *47*, 268-276, <https://doi.org/10.1016/j.biombioe.2012.09.034>.
101. Nkoumbou, C.; Villieras, F.; Barres, O.; Bihannic, I.; Pelletier, M.; Razafitianamaharavo, A.; Metang, V.; Ngoune, C.Y.; Njopwouo, D.; Yvon, J. Physicochemical properties of talc ore from Pout-Kelle and Memel deposits (Central Cameroon). *Clay Miner.* **2008**, *43*, 317-337, <https://doi.org/10.1180/claymin.2008.043.2.11>.
102. Du, C.W.; Zhou, J.M.; Goynes, K.W. Organic and inorganic carbon in paddy soil as evaluated by mid-infrared photoacoustic spectroscopy. *Plos One* **2012**, *7*, <https://doi.org/10.1371/journal.pone.0043368>.
103. Wang, S.; Wang, N.; Yao, K.; Fan, Y.C.; Li, W.H.; Han, W.H.; Yin, X.H.; Chen, D.Y.



Characterization and interpretation of Cd (II) adsorption by different modified rice straws under contrasting conditions. *Scientific Reports* **2019**, *9*, <https://doi.org/10.1038/s41598-019-54337-1>.
